# Signalling speed along a key white matter tract influences memory recall ability in humans

Ian A. Clark<sup>1</sup>, Siawoosh Mohammadi<sup>2</sup>, Martina F. Callaghan<sup>1</sup> & Eleanor A. Maguire<sup>1\*</sup>

<sup>1</sup>Wellcome Centre for Human Neuroimaging, Department of Imaging Neuroscience, UCL Queen Square Institute of Neurology, University College London, London, UK

<sup>2</sup>Institute of Systems Neuroscience, University Medical Centre Hamburg-Eppendorf, Hamburg, Germany

\*For correspondence: [e.maguire@ucl.ac.uk](mailto:e.maguire@ucl.ac.uk)

Competing interests: The authors declare no competing interests.

## Abstract

Conduction velocity is the speed at which electrical signals travel along axons and is a crucial determinant of neural communication. Inferences about conduction velocity can now be made in vivo in humans using magnetic resonance (MR) imaging and a measure called the MR g-ratio. Here, in the first application to cognition, we found that increased MR g-ratio, and by inference faster conduction velocity, specifically in the parahippocampal cingulum bundle, which connects the hippocampus with a range of other brain areas, was associated with better memory recall ability in 217 healthy adults. Moreover, two tract features seemed to favour better memory retrieval – large inner axon diameters and coherently organised neurites, both of which facilitate speedy signalling. These results offer a new perspective on drivers of individual differences in memory recall ability. More broadly, they show that MR g-ratio can provide novel insights into how the human brain processes and integrates information.

## Introduction

Communication between neurons in the brain is critical for cognition, and depends upon action potentials being conveyed along axons within white matter tracts. The speed at which these electrical signals travel along axons is known as the conduction velocity. It has been suggested that faster axonal conduction velocity promotes better cognition. For example, an increase in axonal conduction velocity is hypothesised to underpin the greater cognitive processing ability of vertebrates, in particular primates and humans (Brancucci, 2012; Miller, 1994), compared to invertebrates (Arancibia-Cárcamo et al., 2017; Bullock et al., 1984; Nave, 2010). In rats (Aston-Jones et al., 1985) and cats (Xi et al., 1999), faster axonal conduction velocity has been observed in younger compared to older animals. In a similar vein, axonal degradation that can lead to reduced conduction velocity has been identified in older compared to younger monkeys (Peters et al., 2000; Peters and Sethares, 2002). Slower conduction velocity may, therefore, be a factor in age-related cognitive decline.

Echoing these findings from non-humans, estimates of conduction velocity in humans from the latency of visual evoked potentials recorded over primary visual cortex (Reed and Jensen, 1992) and between the thalamus and parietal cortex (Reed and Jensen, 1993) have been positively correlated with nonverbal intelligence quotients. In addition, faster axonal conduction velocities are thought to better explain increases in intelligence than absolute and relative brain volumes (Dicke and Roth, 2016).

That faster conduction velocity might confer an evolutionary cognitive advantage is perhaps unsurprising. The scope for signals to travel quickly and efficiently between brain regions could make all the difference for an individual's survival.

The conduction velocity of an axon is dependent upon two biological features – the axon diameter and the presence and thickness of a myelin sheath (Gasser and Grundfest, 1939;

Hursh, 1939; Huxley and Stämpeli, 1949; Rushton, 1951). A larger axon diameter results in less resistance to the action potential ion flow, resulting in faster conduction velocity. The presence of a myelin sheath around an axon acts like an electrical insulating layer, reducing ion loss and preserving the action potential, and this helps to maintain or even increase conduction velocity. A key factor in determining an axon's conduction velocity is the g-ratio (Chomiak and Hu, 2009; Rushton, 1951; Schmidt and Knösche, 2019), which is computed as the ratio of the inner axon diameter, or radius, relative to that of the axon plus the myelin sheath that encases it (Figure 1A). Given that the g-ratio encompasses information about the inner axon diameter and myelin thickness, differences in g-ratio can help to differentiate which of these two features might be influencing variations in conduction velocity (Caeyenberghs et al., 2016; Kaller et al., 2017; Lakhani et al., 2016; Waxman, 1980; Xin and Chan, 2020). Here we consider four different scenarios, central to our hypothesis testing, from which faster conduction velocity might arise, with each scenario differing in the underlying microstructure and consequently indexed differently by the g-ratio.

In Figure 1F, inner axon diameter, myelin thickness and g-ratio are plotted together. Myelin thickness is represented by the gradient in background colour and contours, with thinnest myelin at the bottom right, and thickest on the top left. The direction of the arrows describes the change in g-ratio for the microstructural variations presented in the four scenarios of interest. Specifically (1) faster conduction velocity could be due to an increase in the thickness of the myelin sheath, with the inner axon diameter remaining constant. This is observed as a decrease in g-ratio values (Figure 1B and Figure 1F, blue arrow). (2) An increase in conduction velocity could arise primarily from an increase in myelin sheath thickness, but one that is also accompanied by a larger inner axon diameter. Here, a decrease in g-ratio would also be observed, but to a lesser extent than when the inner axon diameter remains constant (Figure 1C and Figure 1F, red arrow). (3) Quicker conduction velocity could be due

predominantly to a larger inner axon diameter, but with some increase in myelin thickness also being present. This would result in an increase in the g-ratio (Figure 1D and Figure 1F, orange arrow). (4) Faster conduction velocity could be a consequence of both the inner axon diameter and myelin thickness increasing proportionally to each other, and a constant g-ratio value would be expected in this circumstance (Figure 1E and Figure 1F, black arrow).

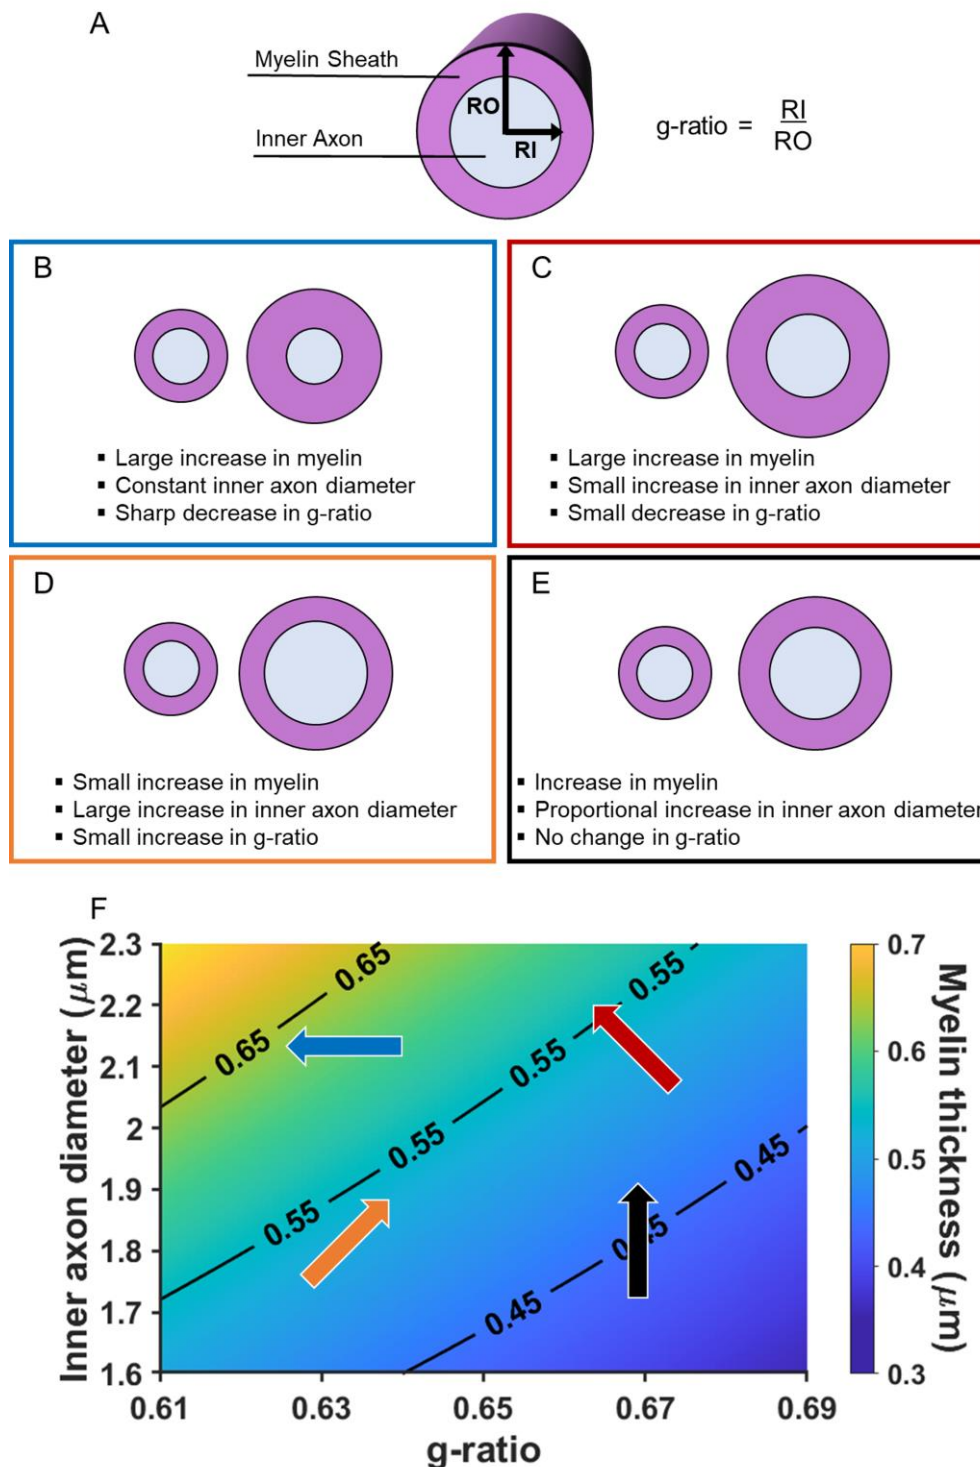

**Figure 1.** Illustration of the g-ratio and how it relates to specific microstructural properties that could give rise to faster conduction velocity. **(A)** Schematic of a myelinated axon. **(B-E)** Illustrations of how changes in axonal microstructure could result in faster conduction velocity, and how these are manifested in the g-ratio. **(F)** Graphical representation of B-E (see Appendix 1 for details of the simulation). Myelin thickness is represented by the gradient in background colour and contours on the graph, with the thinnest myelin at the bottom right and thickest at the top left. The direction of the arrows describes the change in g-ratio for each microstructural variation presented in B-E. The positioning and colours of the arrows correspond to the text box outline colours in B-E.

Until recently, g-ratio measurements have been restricted to invasive studies in animals, consequently limiting its application. However, by combining diffusion magnetic resonance imaging (MRI) with quantitative structural MRI scans optimised to measure myelination (e.g. magnetisation transfer saturation; Weiskopf et al., 2013), it is now possible to estimate the g-ratio in vivo in healthy humans across the whole brain (Drakesmith et al., 2019; Mohammadi et al., 2015; Mohammadi and Callaghan, 2020; Stikov et al., 2015). This is achieved by measuring an aggregate g-ratio, calculating the ensemble average across a voxel of an underlying microstructural distribution of g-ratios (Stikov et al., 2015; West et al., 2016). Whole brain MR g-ratio maps enable the investigation of the MR g-ratio of white matter fibre pathways at the group level. These MR g-ratio estimates have been optimised (Ellerbrock and Mohammadi, 2018; Jung et al., 2018; West et al., 2018) and used to investigate white matter development (Cercignani et al., 2017), changes in the g-ratio during aging (Berman et al., 2018), and as a potential neuroimaging marker in patients with multiple sclerosis (Yu et al., 2019). As far as we are aware, the MR g-ratio has never been examined in relation to cognition. This is despite the novel insights it could provide, for example, into individual differences.

The rich recall of personal past experiences known as autobiographical memories is a critical cognitive function that serves to sustain our sense of self, enable independent living, and prolong survival (Tulving, 2002). While some healthy individuals can recollect decades-old autobiographical memories with great richness and clarity, others struggle to recall what they did last weekend (LePort et al., 2012; Palombo et al., 2015). In the context of the healthy population, we currently lack a clear biological explanation for the basis of these individual differences (Palombo et al., 2018). There is no doubt that the hippocampus is central to the processing of autobiographical memories, and hippocampal damage is linked with autobiographical memory impairments (McCormick et al., 2018; Scoville and Milner, 1957; Winocur and Moscovitch, 2011). However, no consistent relationship between

autobiographical memory recall ability and hippocampal grey matter volume or microstructure has been identified in healthy individuals (Clark et al., 2020; Clark et al., 2021a; LePort et al., 2012; Maguire et al., 2003; Van Petten, 2004). The hippocampus does not act alone, and functional neuroimaging studies have revealed that a distributed set of brain areas supports autobiographical memory recall along with the hippocampus, including the parahippocampal, retrosplenial, parietal and medial prefrontal cortices (Andrews-Hanna et al., 2014; Maguire, 2001; Spreng et al., 2009; Svoboda et al., 2006). Changes in MR g-ratio and, by inference, conduction velocity, might affect communication between these brain regions and so influence individual differences in autobiographical memory recall within the healthy population.

Three white matter pathways in particular enable communication with the hippocampal region – the fornix, the uncinate fasciculus and the parahippocampal cingulum bundle. The fornix (Figure 2A) is a major pathway in and out of the hippocampus and connects it to the orbital and medial prefrontal cortices, the basal forebrain, the anterior thalamus, the hypothalamus and the mammillary bodies (Aggleton et al., 2015; Croxson et al., 2005). The uncinate fasciculus (Figure 2B) originates in the uncus, entorhinal and parahippocampal cortices and passes over the lateral nucleus of the amygdala, arcs around the Sylvian fissure, terminating in various locations throughout the prefrontal cortex (Croxson et al., 2005; Von Der Heide et al., 2013). The parahippocampal cingulum bundle (Figure 2C) links the hippocampus with the entorhinal, parahippocampal, retrosplenial and parietal cortices, as well as providing another route between the hippocampus and anterior thalamus (Bubb et al., 2018; Jones et al., 2013b). It also links to the prefrontal cortex via its connections with other parts of the cingulum bundle.



153

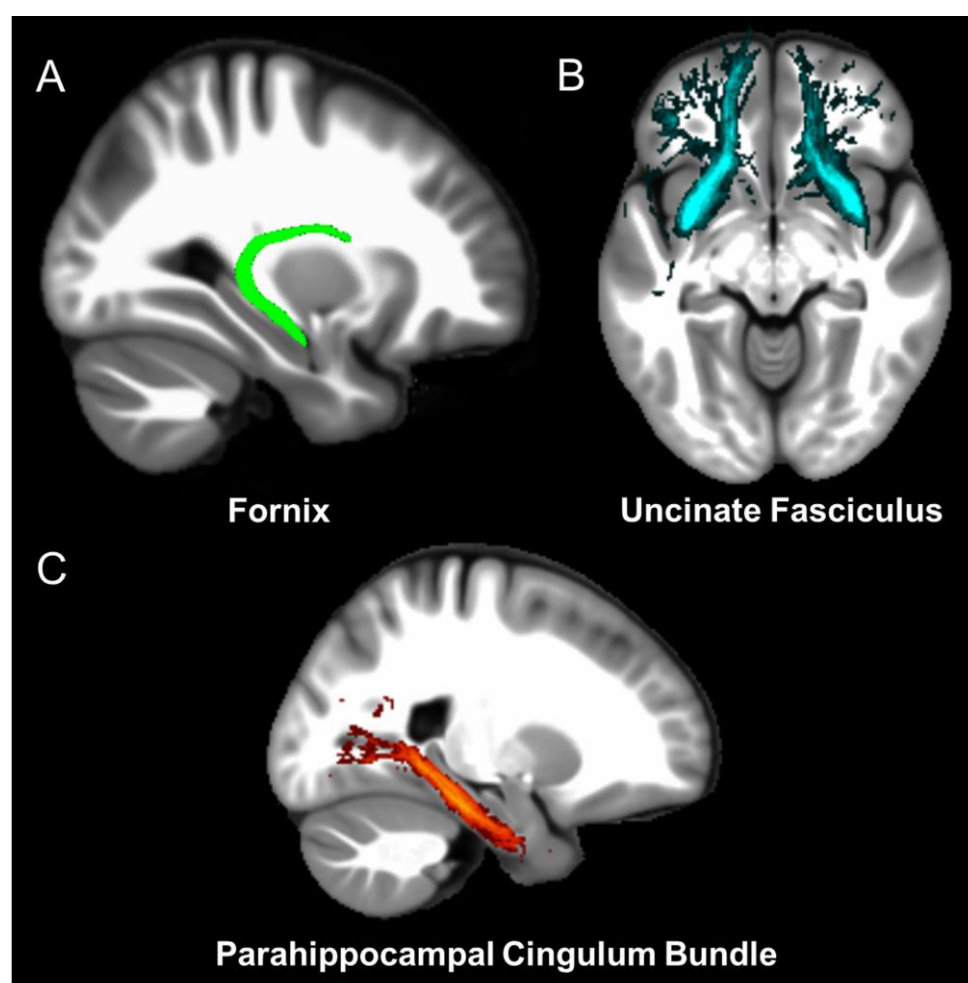

154

155 **Figure 2.** The three white matter tracts of interest, given their relationship with the hippocampal region.  
 156 The white matter tracts were defined using the Johns Hopkins probabilistic white matter tractography  
 157 atlas (Hua et al., 2008), with the minimum probability threshold set to 25%, with the exception of the  
 158 fornix as the available fornix tract was not probabilistic.

159

160 In the current study we calculated the MR g-ratio within these three pathways to  
 161 ascertain whether this was significantly related to autobiographical memory recall ability. The  
 162 relationship of g-ratio to the underlying microstructure as outlined in Figure 1, allowed us to  
 163 further gauge whether any significant effects were more likely to be explained by the extent of  
 164 myelination or the size of the inner axonal diameter of the fibres in these three white matter  
 165 tracts. As well as the MR g-ratio, we also used the neurite orientation dispersion and density  
 166 imaging (NODDI; Zhang et al., 2012) biophysical model to derive two complementary

biological measures that could provide further insights into the arrangement of neurites in a voxel. A neurite is any projection from a neuron's cell body, such as an axon or a dendrite. The neurite orientation dispersion index is an estimate of the organisation of the neurites in a voxel, where a small orientation dispersion index value indicates a low dispersion of neurites, in other words, that the neurites are coherently organised. The second property, neurite density, is a measure of the density of the neurites in a voxel. For completeness, the commonly reported physical parameters (e.g. fractional anisotropy and mean diffusivity; Basser, 1995) that are often derived from diffusion data were also computed (Oeschger et al., 2021; see Appendix 1 and Supplementary files 1 and 2). However, these metrics lack biological specificity (Jensen and Helpert, 2010; Jones et al., 2013a) and, consequently, could not speak to our research questions.

To ensure an appropriate sample size and a wide range of autobiographical memory recall ability, we examined a large group of healthy young adults from the general population ( $n = 217$ ; 109 female, 108 male; mean age of 29.0 years,  $SD = 5.60$ ; age was restricted to between 20-41 years to limit the possible effects of aging).

All participants underwent the widely-used Autobiographical Interview (Levine et al., 2002), which provided a detailed metric characterising their autobiographical memory recall ability as well as a control measure. Diffusion and magnetisation transfer saturation MRI scans were obtained for each person to enable calculation of the MR g-ratio and the other measures. Our analyses were performed using weighted means from each of the three white matter tracts of interest rather than voxel-wise across the whole brain, reducing the potential for false positives (Marek et al., 2022).

Focusing on the fornix, uncinate fasciculus and parahippocampal cingulum bundle, and assuming that better autobiographical memory recall is associated with faster conduction velocity (e.g. Brancucci, 2012; Dicke and Roth, 2016; Reed and Jensen, 1992; Xi et al., 1999),

we predicted that variations in the MR g-ratio from some or all of these tracts would be associated with better autobiographical memory recall ability. We further sought to adjudicate between the scenarios outlined in Figure 1 to ascertain if better autobiographical memory recall was associated with an increase in myelin thickness. This would be reflected as a negative relationship between the MR g-ratio and autobiographical memory recall ability (Figure 1B, C and F – blue and red arrows). Alternatively, better autobiographical memory recall ability could be related to predominantly larger inner axon diameters of the fibres within the tracts. This would be observed in the form of a positive relationship between the MR g-ratio and autobiographical memory recall ability (Figure 1D and F – orange arrow).

## Results

### Autobiographical memory recall

We employed the widely-used Autobiographical Interview (Levine et al., 2002) to score autobiographical memory recall (see Materials and Methods for full details). The main measure of autobiographical memory recall ability was the mean number of “internal” details from the freely recalled autobiographical memories. Internal details are those that describe the specific past event in question, and are considered to reflect episodic information. Across the participants, the mean number of internal details provided per memory was 23.95 ( $SD = 7.25$ ; range = 4.60–44.60).

As a control measure, the mean number of “external” details was also calculated from the autobiographical memory descriptions. External details pertain to semantic information about the past event, and other non-event information. Across the participants, the mean number of external details provided per memory was 5.35 ( $SD = 3.20$ ; range = 0.8–17.40).

## **No relationships between autobiographical memory recall ability and fornix or uncinate fasciculus microstructure measures**

We first investigated the fornix and uncinate fasciculus. None of the measures from either tract were associated with autobiographical memory recall ability. This was the case when using a corrected  $p < 0.017$  (see Materials and Methods) or an uncorrected  $p < 0.05$  threshold. Full details of these results are provided in Appendix 1 (Appendix 1–figures 1 and 2; Appendix 1–tables 1-4), with the source data available in Supplementary file 1.

Of note, and for completeness, we also performed exploratory analyses in six additional white matter tracts: the anterior thalamic radiation, the dorsal cingulum bundle, the forceps minor, the inferior longitudinal fasciculus, the inferior occipitofrontal fasciculus and the superior longitudinal fasciculus. However, as with the fornix and the uncinate fasciculus, none of the metrics from any of these tracts were associated with autobiographical memory recall ability, even when using an uncorrected  $p < 0.05$  threshold (see Appendix 1– figures 3-8 and Appendix 1– tables 5-16 for full details).

As noted in the Introduction, traditional physical parameters (e.g. fractional anisotropy and mean diffusivity) were also extracted for all tracts but, given their lack of biological specificity (Jensen and Helpert, 2010; Jones et al., 2013a), these are reported in Appendix 1– tables 1-16.

## **The parahippocampal cingulum bundle**

We found that variations in autobiographical memory recall ability were uniquely related to the microstructure of the parahippocampal cingulum bundle. This tract connects the hippocampus with the entorhinal, parahippocampal, retrosplenial and parietal cortices, and the anterior thalamus (Figure 3). Moreover, via other subdivisions of the cingulum bundle, it is indirectly connected with prefrontal regions including the medial prefrontal cortex. The

parahippocampal cingulum bundle is, therefore, well positioned for information transfer between the key regions involved in autobiographical memory recall (Andrews-Hanna et al., 2014; Maguire, 2001; Spreng et al., 2009; Svoboda et al., 2006).

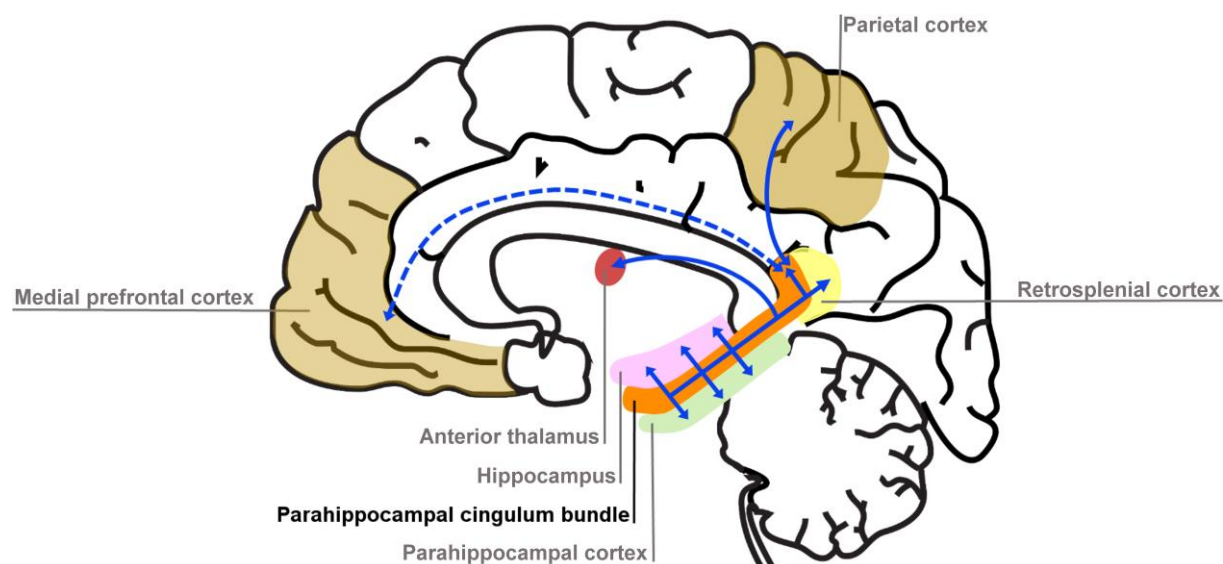

**Figure 3.** Simplified schematic of the location and main connections of the parahippocampal cingulum bundle. The blue lines indicate direct connections, and the dashed blue line an indirect connection.

As with the other tracts (see Materials and Methods), the parahippocampal cingulum bundle region of interest (ROI) was defined bilaterally using the Johns Hopkins probabilistic white matter tractography atlas (Hua et al., 2008). To reduce partial volume effects, we used a conservative minimum probability of 25%, and the tract ROI was refined for each participant to ensure the mask was limited to each person's white matter. The mean number of voxels in the parahippocampal cingulum bundle ROI was 129.11 ( $SD = 25.68$ ), and the variance in number of voxels across individuals was accounted for in our analyses. Table 1 shows the summary statistics for the microstructure measures (see Appendix 1—tables 17 and 18, Appendix 1—figures 9 and 10, and Supplementary file 2 for the traditional physical parameters, e.g. fractional anisotropy, extracted from the parahippocampal cingulum bundle).

**Table 1.** Means and standard deviations for the microstructure measures from the parahippocampal cingulum bundle.

| Microstructure Measure   | Mean  | Standard Deviation |
|--------------------------|-------|--------------------|
| MR g-ratio               | 0.647 | 0.043              |
| Neurite dispersion (ODI) | 0.189 | 0.038              |
| Neurite density          | 0.480 | 0.051              |

Note. ODI = Orientation Dispersion Index

# **Greater MR g-ratio of the parahippocampal cingulum bundle was associated with better autobiographical memory recall**

We first investigated whether the MR g-ratio of the parahippocampal cingulum bundle was associated with autobiographical memory recall ability, performing partial correlation analyses with age, gender, scanner and the number of voxels in the ROI included as covariates. A significant positive association was observed between the parahippocampal cingulum bundle MR g-ratio and the number of internal details (Figure 4A;  $r(211) = 0.18$ ,  $p = 0.008$ , 95% CI = 0.05, 0.29). This relationship was specific to internal details, with no association evident for the external details control measure (Figure 4B;  $r(211) = -0.09$ ,  $p = 0.17$ , 95% CI = -0.21, 0.019). Direct comparison of the correlations confirmed there was a significantly larger correlation between the MR g-ratio and internal details than for external details (Figure 4C; mean  $r$  difference = 0.28 (95% CI = 0.11, 0.45),  $z = 3.21$ ,  $p = 0.0013$ ). Therefore, when MR g-ratio values were higher in the parahippocampal cingulum bundle, suggesting the presence of fibres with larger inner axon diameters (see Figure 1D and 1F, orange arrow), better autobiographical memory recall was observed.

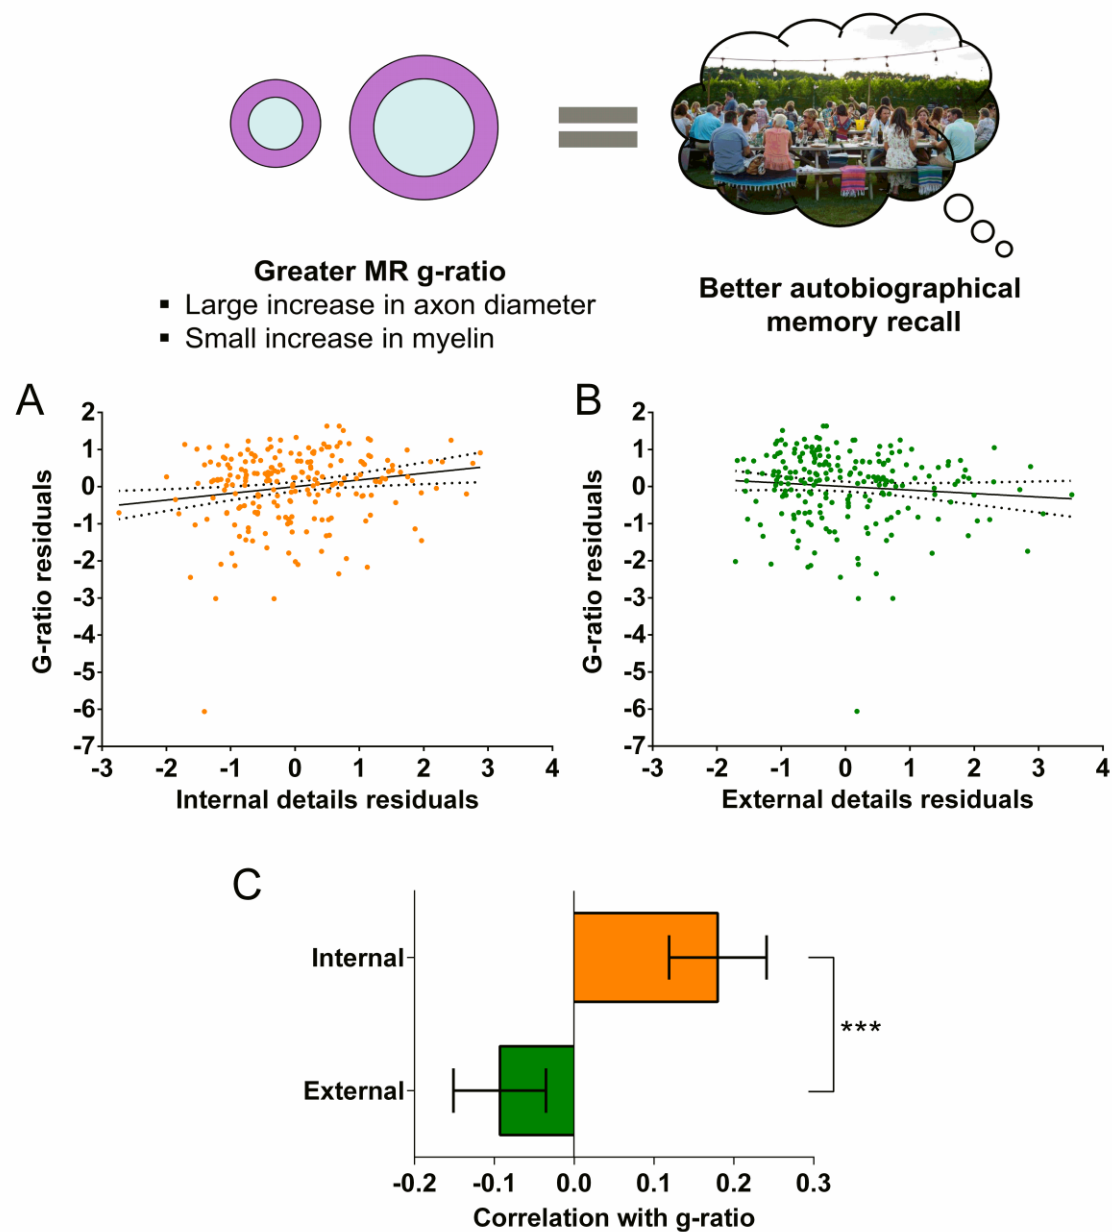

**Figure 4.** G-ratio and the parahippocampal cingulum bundle. The relationship between parahippocampal cingulum bundle MR g-ratio and autobiographical memory recall ability (internal details), and the control measure (external details) are shown. **(A)** There was a significant positive correlation between g-ratio and internal details (dashed lines indicate the confidence intervals). **(B)** There was no significant relationship between g-ratio and external details. **(C)** Bar chart showing the partial correlation coefficients (with standard errors) between g-ratio and internal and external details. There was a significant difference between the correlations when they were directly compared; \*\*\* $p < 0.001$ . Data points for this figure are provided in Figure 4-source data 1.



## **Low neurite dispersion was related to better autobiographical memory recall**

In addition to the MR g-ratio, we also examined the relationship between autobiographical memory recall ability and two complementary biological measures, the neurite orientation dispersion index and neurite density maps estimated using the NODDI biophysical model (Zhang et al., 2012). Partial correlations revealed a significant negative correlation between the neurite orientation dispersion index (a small orientation dispersion index value indicates low dispersion) and internal details (Figure 5A;  $r(211) = -0.19$ ,  $p = 0.005$ , 95% CI = -0.32, -0.06). This was again specific to internal details with no significant relationship between the neurite orientation dispersion index and external details (Figure 5B;  $r(211) = 0.07$ ,  $p = 0.28$ , 95% CI = -0.05, 0.20). Direct comparison of the correlations revealed a significantly larger correlation between the neurite orientation dispersion index and internal details than for external details (Figure 5C; mean  $r$  difference = 0.27 (95% CI = 0.44, 0.10),  $z = 3.13$ ,  $p = 0.0017$ ). Neurite density was not significantly related to either internal ( $r(211) = 0.04$ ,  $p = 0.60$ , 95% CI = -0.09, 0.16), or external ( $r(211) = 0.01$ ,  $p = 0.93$ , 95% CI = -0.12, 0.13) details. Therefore, in addition to a greater MR g-ratio, when neurites in the parahippocampal cingulum bundle were less dispersed and thus more coherently organised, this was associated with better autobiographical memory recall.



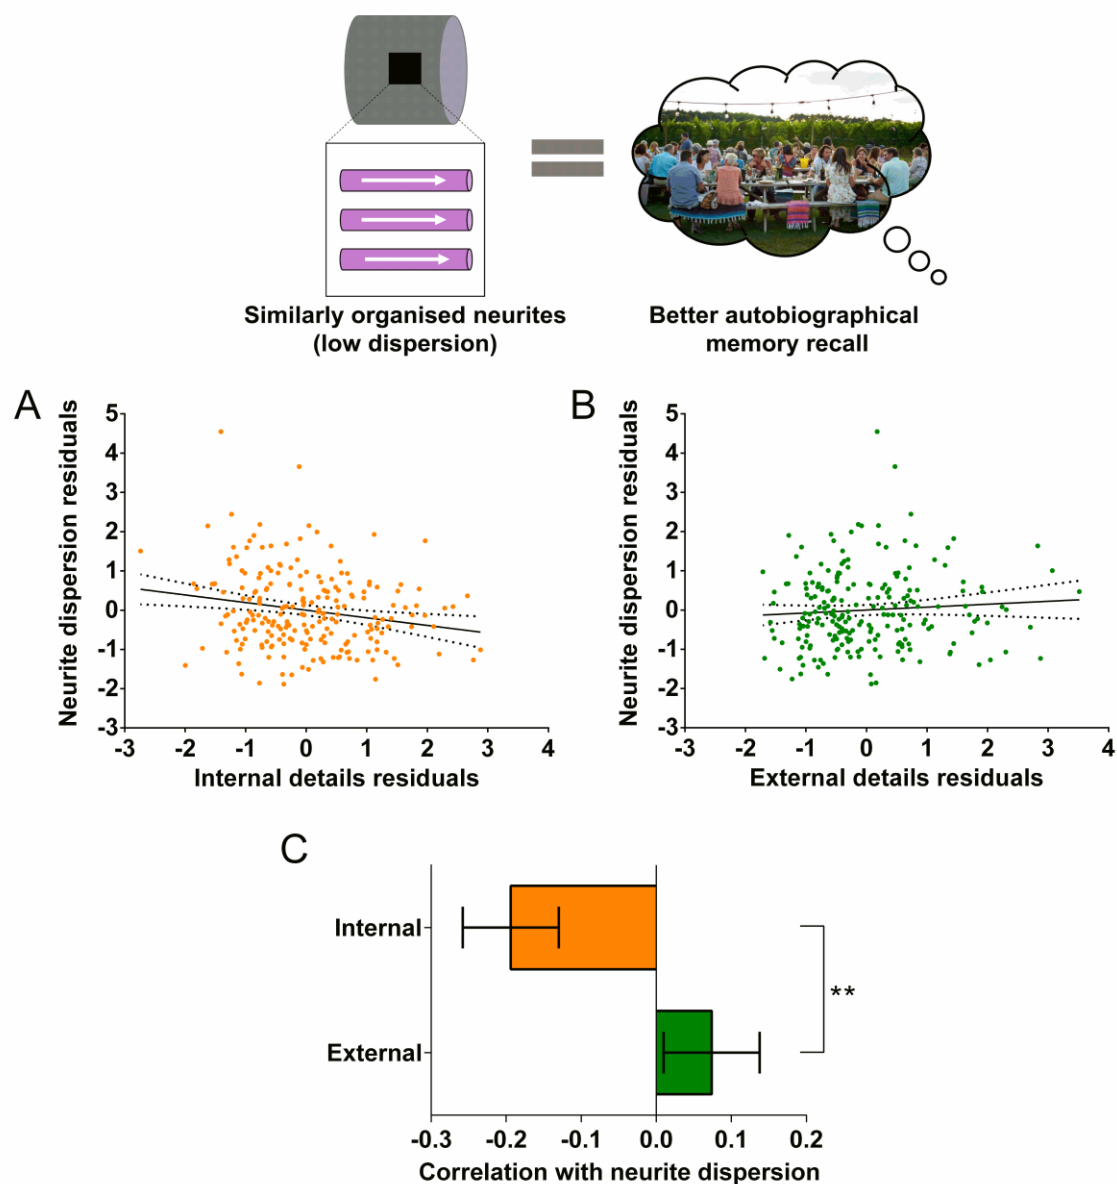

**Figure 5.** Neurite dispersion and the parahippocampal cingulum bundle. The relationship between parahippocampal cingulum bundle neurite dispersion (orientation dispersion index) and autobiographical memory recall ability (internal details), and the control measure (external details) are shown. (A) There was a significant negative correlation between neurite dispersion and internal details (dashed lines indicate the confidence intervals). (B) There was no significant relationship between neurite dispersion and external details. (C) Bar chart showing the partial correlation coefficients (with standard errors) between neurite dispersion and internal and external details. There was a significant difference between the correlations when they were directly compared;  $**p < 0.01$ . Data points for this figure are provided in the Figure 5-source data 1.

## Discussion

The conduction velocity of action potentials along axons is crucial for neural communication. Until recently it was not possible to examine metrics associated with axonal conduction velocity, such as the g-ratio, in vivo in the human brain, with this being largely the preserve of studies involving non-humans. However, by combining diffusion MRI with quantitative structural MRI scans optimised to assess myelination (Weiskopf et al., 2013), it is now possible to estimate the MR g-ratio in vivo in humans (Drakesmith et al., 2019; Mohammadi et al., 2015; Mohammadi and Callaghan, 2020; Stikov et al., 2015). Here, in the first application to human cognition, we found that variations in the MR g-ratio specifically in the parahippocampal cingulum bundle were associated with individual differences in autobiographical memory recall ability in a large sample of healthy adults. Moreover, we were able to identify two particular features in the parahippocampal cingulum bundle that might favour better memory recall, namely larger inner axon diameters, which are indicated by the increased MR g-ratio, and lower neurite dispersion, which suggests more coherently organised neurites. These results offer a new perspective on the neural instantiation of autobiographical memories, and in particular on drivers of individual differences in recall ability. This is especially welcome given the dearth of consistent findings linking hippocampal grey matter volume or microstructure with autobiographical memory recall ability in the healthy population (Clark et al., 2020; Clark et al., 2021a; LePort et al., 2012; Maguire et al., 2003; Van Petten, 2004).

Our use of a biophysical model of the MR signal enabled us to link our findings to different mechanistic processes in the underlying microstructure. We considered four scenarios involving axonal microstructure that could give rise to faster conduction velocities, which in turn might promote better memory recall. As shown in Figure 1, each of these axonal

microstructure changes has a different outcome in terms of the g-ratio. The positive relationship we observed between the MR g-ratio and autobiographical memory recall ability suggests that this effect was associated predominantly with greater inner axon diameter (Figure 1D and Figure 1F, orange arrow). By contrast, had a negative correlation between the MR g-ratio and autobiographical memory recall ability been identified, we could instead have inferred that an increase in myelin was the relevant microstructural feature. Increases in myelination are often held to be a prominent source of white matter alterations associated with changes in behavioural and cognitive performance (Caeyenberghs et al., 2016; Kaller et al., 2017; Lakhani et al., 2016; Waxman, 1980; Xin and Chan, 2020). By contrast, our results highlight the potentially important role that the inner axon diameter could be playing in the recall of a critical form of memory.

We also found that lower neurite dispersion, suggesting more coherent neurite organisation, was related to better autobiographical memory recall ability. Our measure of neurite dispersion was obtained using the NODDI biophysical model (Zhang et al., 2012), which aims to isolate the organisation of the neurites in a voxel from the density of the neurites in a voxel. While neurite dispersion was significantly related to autobiographical memory recall, no relationship was observed with neurite density.

A larger inner axon diameter reduces resistance to action potential signals enabling greater conduction velocities (Gasser and Grundfest, 1939; Hursh, 1939), and coherently organised fibres may decrease the distance signals need to travel, further reducing communication times (Salami et al., 2003; Steriade, 1995). This combination of features might optimise a fibre bundle for faster communication which in turn may enhance autobiographical memory recall.

These results were specific to one white matter tract, the parahippocampal cingulum bundle (Bubb et al., 2018). MR g-ratio measures from no other tract, including the dorsal part

of the cingulum bundle, showed any association with autobiographical memory recall ability. The parahippocampal cingulum bundle directly connects the hippocampus, parahippocampal, retrosplenial and parietal cortices, the anterior thalamus and, through other subdivisions of the cingulum bundle, the medial prefrontal cortex. These regions are typically engaged during fMRI studies of autobiographical memory recall (Andrews-Hanna et al., 2014; Maguire, 2001; Spreng et al., 2009; Svoboda et al., 2006), and damage to them is often associated with autobiographical memory impairments (Berryhill et al., 2007; McCormick et al., 2018; Scoville and Milner, 1957; Vann et al., 2009). The retrosplenial and parahippocampal cortices are thought to provide visuospatial elements of autobiographical memories (Dalton and Maguire, 2017; Epstein and Higgins, 2007; Mullally and Maguire, 2011; Vann et al., 2009), while the medial prefrontal cortex may initiate autobiographical retrieval and support schema-guided recall (Gilboa and Marlatte, 2017; McCormick et al., 2018; McCormick et al., 2020). The parahippocampal cingulum bundle is, therefore, uniquely positioned as a transmission highway enabling this information to reach the hippocampus, where memories can be reconstructed (Bartlett, 1932; Hassabis and Maguire, 2007; Schacter et al., 2012). Larger inner axon diameters and coherently organised neurites could facilitate rapid information flow along the parahippocampal cingulum bundle leading to more memory elements being available simultaneously, which in turn may result in increased detail and better integration of a memory representation.

There have only been a small number of previous studies investigating white matter tracts and individual differences in autobiographical memory recall ability in healthy people, with some suggesting a relationship between the parahippocampal cingulum bundle and autobiographical memory recall (Irish et al., 2014; Memel et al., 2020). However, interpretation of those findings is difficult given the relatively small sample sizes, the older age of participants in some of the studies, and the testing of mixed groups of healthy older people and patients

with dementia. No previous study has examined the MR g-ratio, instead they focussed on commonly reported physical parameters such as fractional anisotropy and mean diffusivity (Basser, 1995). However, these metrics lack biological specificity (Jensen and Helpert, 2010; Jones et al., 2013a) and, consequently, they cannot speak to questions concerning axonal conduction velocity. In a similar vein, we are not aware of any reports of bilateral lesions that selectively compromise or sever the parahippocampal cingulum bundle in humans. Given our findings, we would predict that such lesions would adversely affect the ability to recall autobiographical memories.

Despite its prime location and connectivity at the heart of the brain's autobiographical memory system, the dearth of studies in humans and the rarity of selective bilateral lesions to the parahippocampal cingulum bundle have perhaps obscured its importance when compared to other, more celebrated, memory-related white matter tracts. We also examined two such tracts, the fornix and the uncinate fasciculus, but in both cases no significant relationships between the MR g-ratio, neurite dispersion (or neurite density) and autobiographical memory recall ability were evident in our large cohort of young healthy adults. Both the fornix and parahippocampal cingulum bundle are vulnerable to partial volume effects (Concha et al., 2005). However, to mitigate this issue we took steps to ensure the data were extracted only from white matter voxels (see Materials and Methods). Diffusion data are also susceptible to distortions which can particularly affect the uncinate fasciculus. We addressed this challenge by using a new technique that improves distortion correction in this region (Clark et al., 2021b). The absence of fornix findings in our study could echo those relating to hippocampal volume (Clark et al., 2020; Clark et al., 2021a), whereby the structure is widely acknowledged to be involved in autobiographical memory recall, and damage impedes retrieval (Aggleton et al., 2000; D'Esposito et al., 1995; Gaffan and Gaffan, 1991; Tsivilis et al., 2008), but microstructural variations have limited impact within the healthy adult population. Regarding

the uncinate fasciculus, unilateral lesions do not seem to significantly impair performance on laboratory-based memory tasks (Papagno et al., 2011) or the recall of premorbid autobiographical memories (Levine et al., 2009). Bilateral uncinate fasciculus lesions are very rare in humans, but might result in greater memory impairment. Alternatively, hippocampal-prefrontal connections may be better served by other pathways, for example, via the fornix or parts of the cingulum bundle.

Our findings were not only specific to the parahippocampal cingulum bundle, but also to the internal details of autobiographical memories which reflect the episodicity of past experiences. By contrast, our control measure of external details, which concerns non-episodic information in the autobiographical memories, did not correlate with any white matter microstructure metrics. In addition, age, gender, scanner and the number of voxels within an ROI were included as covariates in all analyses, limiting the potential confounding effects of these variables. Our analyses were also performed using weighted means from each of the three white matter tracts of interest rather than voxel-wise across the whole brain, reducing the potential for false positives (Marek et al., 2022).

While we examined the parahippocampal cingulum bundle as a unitary pathway, it comprises both long and short association fibres with differing connectivity (Bubb et al., 2018). Some fibres will form long range connections between, for example, the hippocampus and retrosplenial cortex, whereas others will make shorter range connections between neighbouring regions. The use of connectome MRI scanners is starting to make examination of short range “u-fibres” possible in vivo in humans (Movahedian Attar et al., 2020; Shastin et al., pre print), and future studies could seek to identify specific connections within the parahippocampal cingulum bundle that relate to individual differences in autobiographical memory recall.

In conclusion, it is perhaps no surprise that speed may be of the essence when it comes to neural communication, and this could influence individual differences in cognition.

Microstructure measures related to conduction velocity are now possible to derive in vivo in humans and have the potential to provide novel insights into how the brain processes and integrates information (Berman et al., 2019; Drakesmith et al., 2019), deepening our understanding of the information flow that underpins critical cognitive functions.

## **Materials and Methods**

### **Participants**

Two hundred and seventeen healthy people took part in the study, including 109 females and 108 males. The age range was restricted to 20-41 years old to limit the possible effects of aging (mean age = 29.0 years,  $SD = 5.60$ ). Participants had English as their first language and reported no history of psychological, psychiatric or neurological conditions. People with hobbies or vocations known to be associated with the hippocampus (e.g. licenced London taxi drivers) were excluded. Participants were reimbursed £10 per hour for taking part which was paid at study completion. All participants gave written informed consent and the study was approved by the University College London Research Ethics Committee (project ID: 6743/001).

A sample size of 217 was determined during study design to be robust to employing different statistical approaches when answering multiple questions of interest. Specifically, the sample allowed for sufficient power to identify medium effect sizes when conducting correlation analyses at alpha levels of 0.01 and when comparing correlations at alpha levels of 0.05 (Cohen, 1992).

## Procedure

Participants completed the study over multiple visits. Diffusion imaging and magnetisation transfer saturation scans were acquired on two separate days, and the Autobiographical Interview was conducted during a third visit. All participants completed all parts of the study.

## The Autobiographical Interview

This widely-used test (Levine et al., 2002) was employed to measure autobiographical memory recall ability. Participants are asked to provide autobiographical memories from a specific time and place over four time periods – early childhood (up to age 11), teenage years (aged from 11-17), adulthood (from age 18 years to 12 months prior to the interview; two memories are requested) and the last year (a memory from the last 12 months); therefore, five memories in total are harvested. Recordings of the memory descriptions are transcribed for later scoring.

The main outcome measure of the Autobiographical Interview is the mean number of internal details included in the description of an event from across the five autobiographical memories. Internal details are those describing the event in question (i.e. episodic details) and include event, place, time and perceptual information, as well as thoughts and emotions relating to the event itself. We used the secondary outcome measure of the Autobiographical Interview, the mean number of external details included in the five autobiographical memories, as a control measure. External details include semantic information concerning the event, or other non-event information, and are not considered to reflect autobiographical memory recall ability.

Double scoring was performed on 20% of the data. Inter-class correlation coefficients, with a two-way random effects model looking for absolute agreement were calculated for both internal and external details. This was performed both for individual memories and as an average of all five memories across each participant. For internal details the coefficients were



0.94 and 0.97 respectively, and for external details they were 0.84 and 0.87 respectively. For reference, a score of 0.8 or above is considered excellent agreement beyond chance.

### **Diffusion MRI data acquisition**

Three MRI scanners were used to collect the neuroimaging data. All scanners were Siemens Magnetom TIM Trio systems with 32 channel head coils and were located at the same neuroimaging centre, running the same software. The sequences were loaded identically onto the individual scanners. Participant set-up and positioning followed the same protocol for each scanner.

Diffusion-weighted images were collected using the multiband accelerated EPI pulse sequence developed by the Centre for Magnetic Resonance Research at the University of Minnesota (R012a-c, R013a on VB17, <https://www.cmrr.umn.edu/multiband/>; Feinberg et al., 2010; Xu et al., 2013). Acquisition parameters were: resolution = 1.7 mm isotropic; FOV = 220 mm × 220 mm × 138 mm; 60 directions with 6 interleaved b0 images, echo time (TE) = 112 ms, repetition time (TR) = 4.84 s, with a multiband acceleration factor of 3. The sequence was performed 4 times – twice with b-values of 1000 and twice with b-values of 2500. The first acquisition of each set of b-values was performed with phase-encoding in the anterior to posterior direction (blip-up), the second in the posterior to anterior direction (blip-down). The total acquisition time was 22 minutes.

### **Magnetisation transfer saturation data acquisition**

The specific scanner used to collect a participant's diffusion-weighted images was also used to obtain their magnetisation transfer saturation map.

Whole brain structural maps of magnetisation transfer saturation, at an isotropic resolution of 800 µm, were derived from a multi-parameter mapping quantitative imaging

protocol (Callaghan et al., 2015; Callaghan et al., 2019; Weiskopf et al., 2013). This protocol consisted of the acquisition of three multi-echo gradient-echo acquisitions with either proton density, T1 or magnetisation transfer weighting. Each acquisition had a TR of 25 ms. Proton density weighting was achieved with an excitation flip angle of  $6^\circ$ , which was increased to  $21^\circ$  to achieve T1 weighting. Magnetisation transfer weighting was achieved through the application of a Gaussian RF pulse 2 kHz off resonance with 4 ms duration and a nominal flip angle of  $220^\circ$ . This acquisition had an excitation flip angle of  $6^\circ$ . The field of view was 256 mm head-foot, 224 mm anterior-posterior, and 179 mm right-left. The multiple gradient echoes per contrast were acquired with alternating readout gradient polarity at eight equidistant echo times ranging from 2.34 to 18.44 ms in steps of 2.30 ms using a readout bandwidth of 488 Hz/pixel. Only six echoes were acquired for the magnetisation transfer weighted volume to facilitate the off-resonance pre-saturation pulse and subsequent spoiling gradient within the TR. To accelerate the data acquisition, partially parallel imaging using the GRAPPA algorithm was employed in each phase-encoded direction (anterior-posterior and right-left) with forty integrated reference lines and a speed up factor of two. Calibration data were also acquired at the outset of each session to correct for inhomogeneities in the RF transmit field (Lutti et al., 2010). The total acquisition time was 27 minutes.

### **Diffusion MRI pre-processing**

The diffusion MRI data were processed using the ACID toolbox ([www.diffusiontools.com](http://www.diffusiontools.com)) within SPM12 ([www.fil.ion.ucl.ac.uk/spm](http://www.fil.ion.ucl.ac.uk/spm)). The weighted average consecutive HySCO pipeline described in Clark et al. (2021b) was followed, with the addition of multi-shell Position-Orientation Adaptive Smoothing (msPOAS; Becker et al., 2012) and Rician bias correction (André et al., 2014). In brief, the blip-up and blip-down data were first separately

corrected for motion and eddy current artefacts. Next, msPOAS was performed, followed by correction for susceptibility-related distortion artefacts using the HySCO2 module (Macdonald and Ruthotto, 2018; Ruthotto et al., 2012). Tensor fitting (Mohammadi et al., 2013) was then implemented separately on each of the distortion corrected blip-up and blip-down datasets to estimate FA maps. HySCO2 was then repeated using the distortion corrected and brain-masked FA maps as input instead of b0 images; the second HySCO2 field map being consecutively applied to the “pre-corrected” diffusion MRI data. Finally, Rician bias noise correction was employed on the distortion corrected data (André et al., 2014), before the data were combined using a weighted average to minimise information loss due to susceptibility distortion blurring induced by local spatial compression.

# **Magnetisation transfer saturation pre-processing**

The magnetisation transfer saturation data were processed for each participant using the hMRI toolbox (Tabelow et al., 2019) within SPM12. The default toolbox configuration settings were used, with the exception that correction for imperfect spoiling was additionally enabled (Corbin and Callaghan, 2021). The output magnetisation transfer saturation map quantified the degree of saturation of the steady state signal induced by the application of the off-resonance pre-pulse, having accounted for spatially varying  $T_1$  times and RF field inhomogeneity (Weiskopf et al., 2013).

Each participant’s magnetisation transfer saturation map was segmented into white matter probability maps using the unified segmentation approach (Ashburner and Friston, 2005), but with no bias field correction (since the magnetisation transfer saturation map does not suffer from any bias field modulation) and using the tissue probability maps developed by Lorio et al. (2016).

## Diffusion model fitting

The MR g-ratio was calculated according to Ellerbrock and Mohammadi (2018):

$$g_{MR} = \sqrt{1 - \frac{MVF_{MR}}{MVF_{MR} + AVF_{MR}}}$$

with  $MVF_{MR}$  being the myelin-volume fraction estimated from the magnetisation transfer saturation map and  $AVF_{MR}$  being the axonal-volume fraction. The  $AVF_{MR}$  was estimated as  $AVF_{MR} = (1 - MVF_{MR}) AWF$  according to Stikov et al. (2015), where AWF was obtained by combining the intra-cellular fraction ( $\nu_{icvf}$ ) and isotropic fraction ( $\nu_{iso}$ ) maps from NODDI (Zhang et al., 2012) as  $AWF = (1 - \nu_{iso}) \nu_{icvf}$ . The magnetisation transfer saturation map was obtained from the hMRI toolbox as described above. For calibration of the magnetisation transfer saturation map to a myelin-volume fraction map ( $MVF_{MR} = \alpha MT_{sat}$ ), we used the g-ratio based calibration method as reported in Ellerbrock and Mohammadi (2018) and Mohammadi and Callaghan (2020), with  $\alpha = 0.1683$ .

The NODDI biophysical model (Zhang et al., 2012) was also used to obtain maps of the neurite orientation dispersion index and neurite density using the NODDI toolbox (<http://mig.cs.ucl.ac.uk/index.php?n=Tutorial.NODDI Matlab>).

Finally, for completeness, Axial-Symmetric DKI (Oeschger et al., 2021) was performed on the pre-processed diffusion data using the ACID toolbox to generate maps of the more commonly reported physical parameters of fractional anisotropy, mean diffusivity, mean kurtosis, diffusivities parallel and diffusivities perpendicular.

## Microstructure data extraction

Microstructure data extraction was performed in Montreal Neurological Institute (MNI) space. The diffusion and magnetisation transfer saturation maps were transformed from native to MNI space using the hMRI toolbox (Tabelow et al., 2019). This involved performing inter-subject registration using DARTEL (Ashburner, 2007) on the segmented magnetisation transfer saturation grey and white matter probability maps, with the resulting DARTEL template and deformations then used to normalize the diffusion and magnetisation transfer saturation maps to MNI space at 1.5 x 1.5 x 1.5mm.

Bilateral tract ROIs were defined using the Johns Hopkins probabilistic white matter tractography atlas (Hua et al., 2008). Our primary foci were the fornix, uncinate fasciculus and parahippocampal cingulum bundle. However, we also performed exploratory analyses on six other tracts - the anterior thalamic radiation, the dorsal cingulum bundle, forceps minor, inferior longitudinal fasciculus, inferior occipitofrontal fasciculus and superior longitudinal fasciculus. To reduce partial volume effects, for all tracts (with the exception of the fornix as the available fornix tract was not probabilistic) the minimum probability threshold was set to 25%. In addition, all of the tract ROIs were refined for each participant using their segmented magnetisation transfer saturation white matter probability map, with a minimum probability of 90% to limit the mask to white matter. This also served to remove any residual mis-alignment from the maps being transformed into MNI space, as no smoothing was performed to preserve the quantitative values. As this resulted in differing tract ROI sizes for each participant, the number of voxels in each tract for each participant was calculated. Mean values of the extracted microstructure metrics from the tract ROIs were determined using a weighted average, where voxels with higher white matter probabilities contributed more to the mean.

## Statistical analyses

Analyses were performed in SPSS v27 unless otherwise stated. Data were summarised using means and standard deviations. There were no missing data, and no data needed to be removed from any analysis.

As we had different tract ROI sizes for each participant, we first assessed whether there were any relationships between the number of voxels in the tract ROIs and autobiographical memory recall ability. We performed partial correlations for each tract between the number of voxels in the tract ROI and the number of internal details on the Autobiographical Interview, with age, gender and scanner as covariates. No significant relationships were identified (all  $r < 0.12$ , all  $p > 0.1$ ). However, to ensure no residual effects were present, the number of voxels in a tract ROI was included as a covariate in the analyses.

In our main analyses, we first investigated the relationships between each microstructure measure and the number of internal details from the Autobiographical Interview using partial correlations, with bootstrapping performed 10,000 times to calculate confidence intervals. Four covariates were included in each partial correlation: age, gender, scanner and the number of voxels in a tract ROI. For these primary analyses, similar partial correlations were performed for the external details control measure. If an internal details correlation was significant, the internal and external details correlations were then directly compared in order to test for statistical difference using the technique described by Meng et al. (1992). This approach extends the Fisher  $z$  transformation, allowing for more accurate testing and comparison of two related correlations. The correlation comparison was performed using the R cocor package v1.1.3 (Diedenhofen and Musch, 2015).

As the microstructure measures were investigated across several tracts, we corrected for the repeated testing of the same measures across our three main tracts of interest (the fornix, the uncinate fasciculus and the parahippocampal cingulum bundle) using the Bonferroni

method; dividing  $\alpha = 0.05$  by 3. Consequently, associations with a two-sided  $p$ -value  $< 0.017$  were considered significant. As the comparison of correlations was performed only when a significant correlation was identified, a two-sided  $p$ -value  $< 0.05$  was deemed significant.

## Acknowledgments

Thanks to Anna Monk, Victoria Hotchin, Gloria Pizzamiglio and Alice Liefgreen for assistance with data collection and scoring. Thanks also to Mohammad Ashtarayeh and Jan Malte Oeschger for their support with implementing the diffusion model fitting and g-ratio calculations.

## Additional information

### Funding

**Funder:** Wellcome

Grant reference numbers: 101759/Z/13/Z; 210567/Z/18/Z; 203147/Z/16/Z

**Author:** Eleanor A. Maguire

**Funder:** ERA-NET NEURON

Grant reference number: hMRI-ofSCI

**Author:** Martina Callaghan, Siawoosh Mohammadi

**Funder:** German Federal Ministry of Education and Research

Grant reference number: 01EW1711A and B

664 **Author:** Siawoosh Mohammadi

665

666 **Funder:** German Research Foundation

667 Grant reference numbers: MO 2397/5-1; MO 2397/4-1

668 **Author:** Siawoosh Mohammadi

669

670 **Funder:** Forschungszentrums Medizintechnik Hamburg

671 Grant reference numbers: 01fmthh2017

672 **Author:** Siawoosh Mohammadi

673

674 **Funder:** MRC and Spinal Research Charity

675 Grant reference number: MR/R000050/1

676 **Author:** Martina F. Callaghan

677

678 The funders had no role in study design, data collection and interpretation, or the decision to  
679 submit the work for publication.

680

# 681 **Author contributions**

682 Ian A Clark: conceptualization, methodology, investigation, data scoring, formal analysis,  
683 writing – original draft, writing - review & editing; Siawoosh Mohammadi: formal analysis,  
684 writing - review & editing; Martina F Callaghan: Formal analysis, writing - review & editing;



Eleanor A. Maguire: conceptualization, methodology, funding acquisition, supervision, formal analysis, writing – original draft, writing - review & editing

## Author ORCIDs

Ian A. Clark <https://orcid.org/0000-0002-5678-2190>

Siawoosh Mohammadi <https://orcid.org/0000-0003-1311-9636>

Martina F. Callaghan <https://orcid.org/0000-0003-0374-1659>

Eleanor A. Maguire <https://orcid.org/0000-0002-9470-6324>

## Ethics

Human subjects: All participants gave written informed consent and the study was approved by the University College London Research Ethics Committee (project ID: 6743/001).

## Additional files

- Appendix 1. Details of the simulation performed for Figure 1f. Investigation of the MR g-ratio, neurite orientation dispersion index, neurite density and physical parameters in the fornix and uncinate fasciculus - no significant relationships were identified. Exploratory analyses of the MR g-ratio, neurite orientation dispersion index, neurite density and physical parameters in other white matter tracts – no significant relationships were identified. Investigation of the physical parameters extracted from the parahippocampal cingulum bundle.
- Supplementary file 1. Microstructure and physical parameters data for the fornix and uncinate fasciculus.

- Supplementary file 2. Physical parameters data for the parahippocampal cingulum bundle and source data for Appendix 1-figures 9 and 10.
- Figure 4-source data 1
- Figure 5-source data 1
- Materials Design Analysis Reporting (MDAR) Form

## Data availability

The data for every participant are provided in Figure 4-source data 1, Figure 5-source data 1, Supplementary file 1 and Supplementary file 2.

## References

- Aggleton JP, McMackin D, Carpenter K, Hornak J, Kapur N, Halpin S, Wiles CM, Kamel H, Brennan P, Carton S, Gaffan D (2000) **Differential cognitive effects of colloid cysts in the third ventricle that spare or compromise the fornix** *Brain* **123**:800-815. <http://dx.doi.org/10.1093/brain/123.4.800>
- Aggleton JP, Wright NF, Rosene DL, Saunders RC (2015) **Complementary patterns of direct amygdala and hippocampal projections to the macaque prefrontal cortex** *Cerebral Cortex* **25**:4351-4373. <http://dx.doi.org/10.1093/cercor/bhv019>
- André ED, Grinberg F, Farrher E, Maximov II, Shah NJ, Meyer C, Jaspar M, Muto V, Phillips C, Balteau E (2014) **Influence of noise correction on intra- and inter-subject variability of quantitative metrics in diffusion kurtosis imaging** *PloS One* **9**:e94531. <http://dx.doi.org/10.1371/journal.pone.0094531>
- Andrews-Hanna JR, Saxe R, Yarkoni T (2014) **Contributions of episodic retrieval and mentalizing to autobiographical thought: Evidence from functional neuroimaging, resting-state connectivity, and fMRI meta-analyses** *NeuroImage* **91**:324-335. <http://dx.doi.org/10.1016/j.neuroimage.2014.01.032>
- Arancibia-Cárcamo IL, Ford MC, Cossell L, Ishida K, Tohyama K, Attwell D (2017) **Node of Ranvier length as a potential regulator of myelinated axon conduction speed** *eLife* **6**:e23329. <http://dx.doi.org/10.7554/eLife.23329>
- Ashburner J, Friston KJ (2005) **Unified segmentation** *NeuroImage* **26**:839-851. <http://dx.doi.org/10.1016/j.neuroimage.2005.02.018>
- Ashburner J (2007) **A fast diffeomorphic image registration algorithm** *NeuroImage* **38**:95-113. <http://dx.doi.org/10.1016/j.neuroimage.2007.07.007>
- Aston-Jones G, Rogers J, Shaver RD, Dinan TG, Moss DE (1985) **Age-impaired impulse flow from nucleus basalis to cortex** *Nature* **318**:462-464. <http://dx.doi.org/10.1038/318462a0>

- Bartlett FC (1932) **Remembering: A study in experimental and social psychology.** Cambridge University Press, Cambridge, England.
- Basser PJ (1995) **Inferring microstructural features and the physiological state of tissues from diffusion-weighted images** *NMR in Biomedicine* **8**:333-344. <http://dx.doi.org/10.1002/nbm.1940080707>
- Becker SMA, Tabelow K, Voss HU, Anwander A, Heidemann RM, Polzehl J (2012) **Position-orientation adaptive smoothing of diffusion weighted magnetic resonance data (POAS)** *Medical Image Analysis* **16**:1142-1155. <http://dx.doi.org/10.1016/j.media.2012.05.007>
- Berman S, West KL, Does MD, Yeatman JD, Mezer AA (2018) **Evaluating g-ratio weighted changes in the corpus callosum as a function of age and sex** *NeuroImage* **182**:304-313. <http://dx.doi.org/10.1016/j.neuroimage.2017.06.076>
- Berman S, Filo S, Mezer AA (2019) **Modeling conduction delays in the corpus callosum using MRI-measured g-ratio** *NeuroImage* **195**:128-139. <http://dx.doi.org/10.1016/j.neuroimage.2019.03.025>
- Berryhill ME, Phuong L, Picasso L, Cabeza R, Olson IR (2007) **Parietal lobe and episodic memory: Bilateral damage causes impaired free recall of autobiographical memory** *Journal of Neuroscience* **27**:14415. <http://dx.doi.org/10.1523/JNEUROSCI.4163-07.2007>
- Brancucci A (2012) **Neural correlates of cognitive ability** *Journal of Neuroscience Research* **90**:1299-1309. <https://doi.org/10.1002/jnr.23045>
- Bubb EJ, Metzler-Baddeley C, Aggleton JP (2018) **The cingulum bundle: Anatomy, function, and dysfunction** *Neuroscience & Biobehavioral Reviews* **92**:104-127. <http://dx.doi.org/10.1016/j.neubiorev.2018.05.008>
- Bullock TH, Moore JK, Fields RD (1984) **Evolution of myelin sheaths: Both lamprey and hagfish lack myelin** *Neuroscience Letters* **48**:145-148. [http://dx.doi.org/10.1016/0304-3940\(84\)90010-7](http://dx.doi.org/10.1016/0304-3940(84)90010-7)
- Caeyenberghs K, Metzler-Baddeley C, Foley S, Jones DK (2016) **Dynamics of the human structural connectome underlying working memory training** *The Journal of Neuroscience* **36**:4056. <http://dx.doi.org/10.1523/JNEUROSCI.1973-15.2016>
- Callaghan MF, Josephs O, Herbst M, Zaitsev M, Todd N, Weiskopf N (2015) **An evaluation of prospective motion correction (PMC) for high resolution quantitative MRI** *Frontiers in Neuroscience* **9**. <http://dx.doi.org/10.3389/fnins.2015.00097>
- Callaghan MF, Lutti A, Ashburner J, Balteau E, Corbin N, Draganski B, Helms G, Kherif F, Leutritz T, Mohammadi S, Phillips C, Reimer E, Ruthotto L, Seif M, Tabelow K, Ziegler G, Weiskopf N (2019) **Example dataset for the hMRI toolbox** *Data in Brief* **25**:104132. <http://dx.doi.org/10.1016/j.dib.2019.104132>
- Cercignani M, Giulietti G, Dowell NG, Gabel M, Broad R, Leigh PN, Harrison NA, Bozzali M (2017) **Characterizing axonal myelination within the healthy population: a tract-by-tract mapping of effects of age and gender on the fiber g-ratio** *Neurobiology of Aging* **49**:109-118. <http://dx.doi.org/10.1016/j.neurobiolaging.2016.09.016>
- Chomiak T, Hu B (2009) **What is the optimal value of the g-ratio for myelinated fibers in the rat CNS? A theoretical approach** *PloS One* **4**:e7754. <http://dx.doi.org/10.1371/journal.pone.0007754>
- Clark IA, Monk AM, Hotchin V, Pizzamiglio G, Liefgreen A, Callaghan MF, Maguire EA (2020) **Does hippocampal volume explain performance differences on hippocampal-dependent tasks?** *NeuroImage* **221**:117211. <http://dx.doi.org/10.1016/j.neuroimage.2020.117211>

- Clark IA, Callaghan MF, Weiskopf N, Maguire EA (2021a) **The relationship between hippocampal-dependent task performance and hippocampal grey matter myelination and iron content** *Brain and Neuroscience Advances* 5:1-8. <http://dx.doi.org/10.1177/23982128211011923>
- Clark IA, Callaghan MF, Weiskopf N, Maguire EA, Mohammadi S (2021b) **Reducing susceptibility distortion related image blurring in diffusion MRI EPI data** *Frontiers in Neuroscience* 15:706473. <https://dx.doi.org/10.3389/fnins.2021.706473>
- Cohen J (1992) **A power primer** *Psychological Bulletin* 112:155-159. <http://dx.doi.org/10.1037/0033-2909.112.1.155>
- Concha L, Gross DW, Beaulieu C (2005) **Diffusion tensor tractography of the limbic system** *American Journal of Neuroradiology* 26:2267-2274.
- Corbin N, Callaghan MF (2021) **Imperfect spoiling in variable flip angle T1 mapping at 7T: quantifying and minimising impact** *Magnetic Resonance in Medicine* 86:693-708. <http://dx.doi.org/10.1002/mrm.28720>
- Croxson PL, Johansen-Berg H, Behrens TEJ, Robson MD, Pinski MA, Gross CG, Richter W, Richter MC, Kastner S, Rushworth MFS (2005) **Quantitative investigation of connections of the prefrontal cortex in the human and macaque using probabilistic diffusion tractography** *Journal of Neuroscience* 25:8854-8866. <http://dx.doi.org/10.1523/JNEUROSCI.1311-05.2005>
- D'Esposito M, Verfaellie M, Alexander MP, Katz DI (1995) **Amnesia following traumatic bilateral fornix transection** *Neurology* 45:1546. <http://dx.doi.org/10.1212/WNL.45.8.1546>
- Dalton MA, Maguire EA (2017) **The pre/parasubiculum: a hippocampal hub for scene-based cognition?** *Current Opinion in Behavioral Sciences* 17:34-40. <http://dx.doi.org/10.1016/j.cobeha.2017.06.001>
- Dicke U, Roth G (2016) **Neuronal factors determining high intelligence** *Philosophical Transactions of the Royal Society of London. Series B: Biological Sciences* 371:20150180. <http://dx.doi.org/10.1098/rstb.2015.0180>
- Diedenhofen B, Musch J (2015) **cocor: A comprehensive solution for the statistical comparison of correlations** *PloS One* 10:e0121945. <http://dx.doi.org/10.1371/journal.pone.0121945>
- Drakesmith M, Harms R, Rudrapatna SU, Parker GD, Evans CJ, Jones DK (2019) **Estimating axon conduction velocity in vivo from microstructural MRI** *NeuroImage* 203:116186. <http://dx.doi.org/10.1016/j.neuroimage.2019.116186>
- Ellerbrock I, Mohammadi S (2018) **Four in vivo g-ratio-weighted imaging methods: Comparability and repeatability at the group level** *Frontiers in Neuroscience* 39:24-41. <http://dx.doi.org/10.1002/hbm.23858>
- Epstein RA, Higgins JS (2007) **Differential parahippocampal and retrosplenial involvement in three types of visual scene recognition** *Cerebral Cortex* 17:1680-1693. <http://dx.doi.org/10.1093/cercor/bhl079>
- Feinberg DA, Moeller S, Smith SM, Auerbach E, Ramanna S, Glasser MF, Miller KL, Ugurbil K, Yacoub E (2010) **Multiplexed echo planar imaging for sub-second whole brain fMRI and fast diffusion imaging** *PloS One* 5:e15710. <http://dx.doi.org/10.1371/journal.pone.0015710>
- Gaffan D, Gaffan EA (1991) **Amnesia in man following transection of the fornix: A review** *Brain* 114:2611-2618. <http://dx.doi.org/10.1093/brain/114.6.2611>
- Gasser HS, Grundfest H (1939) **Axon diameters in relation to the spike dimensions and the conduction velocity in mammalian a fibers** *American Journal of Physiology* 127:393-414. <http://dx.doi.org/10.1152/ajplegacy.1939.127.2.393>

- Gilboa A, Marlatte H (2017) **Neurobiology of schemas and schema-mediated memory** *Trends in Cognitive Sciences* **21**:618-631. <http://dx.doi.org/10.1016/j.tics.2017.04.013>
- Hassabis D, Maguire EA (2007) **Deconstructing episodic memory with construction** *Trends in Cognitive Sciences* **11**:299-306. <http://dx.doi.org/10.1016/j.tics.2007.05.001>
- Hua K, Zhang J, Wakana S, Jiang H, Li X, Reich DS, Calabresi PA, Pekar JJ, van Zijl PCM, Mori S (2008) **Tract probability maps in stereotaxic spaces: Analyses of white matter anatomy and tract-specific quantification** *NeuroImage* **39**:336-347. <http://dx.doi.org/10.1016/j.neuroimage.2007.07.053>
- Hursh JB (1939) **Conduction velocity and diameter of nerve fibers** *American Journal of Physiology* **127**:131-139. <http://dx.doi.org/10.1152/ajplegacy.1939.127.1.131>
- Huxley AF, Stämpeli R (1949) **Evidence for saltatory conduction in peripheral myelinated nerve fibres** *Journal of Physiology* **108**:315-339. <https://doi.org/10.1113/jphysiol.1949.sp004335>
- Irish M, Hornberger M, El Wahsh S, Lam BYK, Lah S, Miller L, Hsieh S, Hodges JR, Piguet O (2014) **Grey and white matter correlates of recent and remote autobiographical memory retrieval – Insights from the dementias** *PloS One* **9**:e113081. <http://dx.doi.org/10.1371/journal.pone.0113081>
- Jensen JH, Helpert JA (2010) **MRI quantification of non-Gaussian water diffusion by kurtosis analysis** *NMR in Biomedicine* **23**:698-710. <http://dx.doi.org/10.1002/nbm.1518>
- Jones DK, Knösche TR, Turner R (2013a) **White matter integrity, fiber count, and other fallacies: The do's and don'ts of diffusion MRI** *NeuroImage* **73**:239-254. <http://dx.doi.org/10.1016/j.neuroimage.2012.06.081>
- Jones DK, Christiansen KF, Chapman RJ, Aggleton JP (2013b) **Distinct subdivisions of the cingulum bundle revealed by diffusion MRI fibre tracking: Implications for neuropsychological investigations** *Neuropsychologia* **51**:67-78. <http://dx.doi.org/10.1016/j.neuropsychologia.2012.11.018>
- Jung W, Lee J, Shin H-G, Nam Y, Zhang H, Oh S-H, Lee J (2018) **Whole brain g-ratio mapping using myelin water imaging (MWI) and neurite orientation dispersion and density imaging (NODDI)** *NeuroImage* **182**:379-388. <http://dx.doi.org/10.1016/j.neuroimage.2017.09.053>
- Kaller MS, Lazari A, Blanco-Duque C, Sampaio-Baptista C, Johansen-Berg H (2017) **Myelin plasticity and behaviour—connecting the dots** *Current Opinion in Neurobiology* **47**:86-92. <http://dx.doi.org/10.1016/j.conb.2017.09.014>
- Lakhani B, Borich MR, Jackson JN, Wadden KP, Peters S, Villamayor A, MacKay AL, Vavasour IM, Rauscher A, Boyd LA (2016) **Motor skill acquisition promotes human brain myelin plasticity** *Neural Plasticity*:7526135. <http://dx.doi.org/10.1155/2016/7526135>
- LePort AKR, Mattfeld AT, Dickinson-Anson H, Fallon JH, Stark CEL, Kruggel F, Cahill L, McGaugh JL (2012) **Behavioral and neuroanatomical investigation of Highly Superior Autobiographical Memory (HSAM)** *Neurobiology of Learning and Memory* **98**:78-92. <http://dx.doi.org/10.1016/j.nlm.2012.05.002>
- Levine B, Svoboda E, Hay JF, Winocur G, Moscovitch M (2002) **Aging and autobiographical memory: Dissociating episodic from semantic retrieval** *Psychology and Aging* **17**:677-689. <http://dx.doi.org/10.1037/0882-7974.17.4.677>
- Levine B, Svoboda E, Turner GR, Mandic M, Mackey A (2009) **Behavioral and functional neuroanatomical correlates of anterograde autobiographical memory in isolated retrograde amnesic patient M.L** *Neuropsychologia* **47**:2188-2196. <http://doi.org/10.1016/j.neuropsychologia.2008.12.026>



- 891 Lorio S, Fresard S, Adaszewski S, Kherif F, Chowdhury R, Frackowiak RS, Ashburner J,  
892 Helms G, Weiskopf N, Lutti A, Draganski B (2016) **New tissue priors for improved**  
893 **automated classification of subcortical brain structures on MRI** *NeuroImage*  
894 **130**:157-166. <http://dx.doi.org/10.1016/j.neuroimage.2016.01.062>
- 895 Lutti A, Hutton C, Finsterbusch J, Helms G, Weiskopf N (2010) **Optimization and validation**  
896 **of methods for mapping of the radiofrequency transmit field at 3T** *Magnetic*  
897 *Resonance in Medicine* **64**:229-238. <http://dx.doi.org/doi:10.1002/mrm.22421>
- 898 Macdonald J, Ruthotto L (2018) **Improved susceptibility artifact correction of echo-planar**  
899 **MRI using the alternating direction method of multipliers** *Journal of Mathematical*  
900 *Imaging and Vision* **60**:268-282. <http://dx.doi.org/10.1007/s10851-017-0757-x>
- 901 Maguire EA (2001) **Neuroimaging studies of autobiographical event memory**  
902 *Philosophical Transactions of the Royal Society of London. Series B: Biological*  
903 *Sciences* **356**:1441-1451. <http://dx.doi.org/10.1098/rstb.2001.0944>
- 904 Maguire EA, Valentine ER, Wilding JM, Kapur N (2003) **Routes to remembering: the brains**  
905 **behind superior memory** *Nature Neuroscience* **6**:90-95.  
906 <http://dx.doi.org/10.1038/nn988>
- 907 Marek S, Tervo-Clemmens B, Calabro FJ, Montez DF, Kay BP, Hatoum AS, Donohue MR,  
908 Foran W, Miller RL, Hendrickson TJ, Malone SM, Kandala S, Feczko E, Miranda-  
909 Dominguez O, Graham AM, Earl EA, Perrone AJ, Cordova M, Doyle O, Moore LA,  
910 Conan GM, Uriarte J, Snider K, Lynch BJ, Wilgenbusch JC, Pengo T, Tam A, Chen J,  
911 Newbold DJ, Zheng A, Seider NA, Van AN, Metoki A, Chauvin RJ, Laumann TO,  
912 Greene DJ, Petersen SE, Garavan H, Thompson WK, Nichols TE, Yeo BTT, Barch  
913 DM, Luna B, Fair DA, Dosenbach NUF (2022) **Reproducible brain-wide association**  
914 **studies require thousands of individuals** *Nature* **603**:654-660.  
915 <http://dx.doi.org/10.1038/s41586-022-04492-9>
- 916 McCormick C, Ciaramelli E, De Luca F, Maguire EA (2018) **Comparing and contrasting the**  
917 **cognitive effects of hippocampal and ventromedial prefrontal cortex damage: A**  
918 **review of human lesion studies** *Neuroscience* **274**:295-318.  
919 <http://dx.doi.org/10.1016/j.neuroscience.2017.07.066>
- 920 McCormick C, Barry DN, Jafarian A, Barnes GR, Maguire EA (2020) **vmPFC drives**  
921 **hippocampal processing during autobiographical memory recall regardless of**  
922 **remoteness** *Cerebral Cortex* **30**:5972-5987. <http://dx.doi.org/10.1093/cercor/bhaa172>
- 923 Memel M, Wank AA, Ryan L, Grilli MD (2020) **The relationship between episodic detail**  
924 **generation and anterotemporal, posteromedial, and hippocampal white matter**  
925 **tracts** *Cortex* **123**:124-140. <http://dx.doi.org/10.1016/j.cortex.2019.10.010>
- 926 Meng X-L, Rosenthal R, Rubin DB (1992) **Comparing correlated correlation coefficients**  
927 *Psychological Bulletin* **111**:172-175. <http://dx.doi.org/10.1037/0033-2909.111.1.172>
- 928 Miller EM (1994) **Intelligence and brain myelination: A hypothesis** *Personality and*  
929 *Individual Differences* **17**:803-832. [http://dx.doi.org/10.1016/0191-8869\(94\)90049-3](http://dx.doi.org/10.1016/0191-8869(94)90049-3)
- 930 Mohammadi S, Freund P, Feiweier T, Curt A, Weiskopf N (2013) **The impact of post-**  
931 **processing on spinal cord diffusion tensor imaging** *NeuroImage* **70**:377-385.  
932 <http://dx.doi.org/10.1016/j.neuroimage.2012.12.058>
- 933 Mohammadi S, Carey D, Dick F, Diedrichsen J, Sereno MI, Reiser M, Callaghan MF,  
934 Weiskopf N (2015) **Whole-brain in-vivo measurements of the axonal g-ratio in a**  
935 **group of 37 healthy volunteers** *Frontiers in Neuroscience* **9**.  
936 <http://dx.doi.org/10.3389/fnins.2015.00441>
- 937 Mohammadi S, Callaghan MF (2020) **Towards in vivo g-ratio mapping using MRI:**  
938 **unifying myelin and diffusion imaging** *Journal of Neuroscience Methods*:108990.  
939 <https://dx.doi.org/10.1016/j.jneumeth.2020.108990>

- Movahedian Attar F, Kirilina E, Haenelt D, Pine KJ, Trampel R, Edwards LJ, Weiskopf N (2020) **Mapping short association fibers in the early cortical visual processing stream using in vivo diffusion tractography** *Cerebral Cortex* **30**:4496-4514. <http://dx.doi.org/10.1093/cercor/bhaa049>
- Mullally SL, Maguire EA (2011) **A new role for the parahippocampal cortex in representing space** *The Journal of Neuroscience* **31**:7441-7449. <http://dx.doi.org/10.1523/JNEUROSCI.0267-11.2011>
- Nave K-A (2010) **Myelination and support of axonal integrity by glia** *Nature* **468**:244-252. <http://dx.doi.org/10.1038/nature09614>
- Oeschger J, Tabelow K, Mohammadi S (2021) **Reducing rician noise bias in axial-symmetric diffusion kurtosis imaging and biophysical tissue models**, Proceedings of the International Society for Magnetic Resonance in Medicine Scientific Meeting and Exhibition, p. 3654.
- Palombo DJ, Alain C, Söderlund H, Khuu W, Levine B (2015) **Severely deficient autobiographical memory (SDAM) in healthy adults: A new mnemonic syndrome** *Neuropsychologia* **72**:105-118. <http://dx.doi.org/10.1016/j.neuropsychologia.2015.04.012>
- Palombo DJ, Sheldon S, Levine B (2018) **Individual differences in autobiographical memory** *Trends in Cognitive Sciences* **22**:583-597. <http://dx.doi.org/10.1016/j.tics.2018.04.007>
- Papagno C, Miracapillo C, Casarotti A, Romero Lauro LJ, Castellano A, Falini A, Casaceli G, Fava E, Bello L (2011) **What is the role of the uncinate fasciculus? Surgical removal and proper name retrieval** *Brain* **134**:405-414. <http://dx.doi.org/10.1093/brain/awq283>
- Peters A, Moss MB, Sethares C (2000) **Effects of aging on myelinated nerve fibers in monkey primary visual cortex** *Journal of Comparative Neurology* **419**:364-376. [https://doi.org/10.1002/\(SICI\)1096-9861\(20000410\)419:3<364::AID-CNE8>3.0.CO;2-R](https://doi.org/10.1002/(SICI)1096-9861(20000410)419:3<364::AID-CNE8>3.0.CO;2-R)
- Peters A, Sethares C (2002) **Aging and the myelinated fibers in prefrontal cortex and corpus callosum of the monkey** *Journal of Comparative Neurology* **442**:277-291. <http://dx.doi.org/10.1002/cne.10099>
- Reed ET, Jensen AR (1993) **A somatosensory latency between the thalamus and cortex also correlates with level of intelligence** *Intelligence* **17**:443-450. [http://dx.doi.org/10.1016/0160-2896\(93\)90011-S](http://dx.doi.org/10.1016/0160-2896(93)90011-S)
- Reed TE, Jensen AR (1992) **Conduction velocity in a brain nerve pathway of normal adults correlates with intelligence level** *Intelligence* **16**:259-272. [http://dx.doi.org/10.1016/0160-2896\(92\)90009-G](http://dx.doi.org/10.1016/0160-2896(92)90009-G)
- Rushton WAH (1951) **A theory of the effects of fibre size in medullated nerve** *Journal of Physiology* **115**:101-122. <https://doi.org/10.1113/jphysiol.1951.sp004655>
- Ruthotto L, Kugel H, Olesch J, Fischer B, Modersitzki J, Burger M, Wolters CJPiM, Biology (2012) **Diffeomorphic susceptibility artifact correction of diffusion-weighted magnetic resonance images** *Physics in Medicine and Biology* **57**:5715. <http://dx.doi.org/10.1088/0031-9155/57/18/5715>
- Salami M, Itami C, Tsumoto T, Kimura F (2003) **Change of conduction velocity by regional myelination yields constant latency irrespective of distance between thalamus and cortex** *Proceedings of the National Academy of Sciences* **100**:6174. <http://dx.doi.org/10.1073/pnas.0937380100>

- Schacter DL, Addis DR, Hassabis D, Martin VC, Spreng RN, Szpunar KK (2012) **The future of memory: Remembering, imagining, and the brain** *Neuron* **76**:677-694. <http://dx.doi.org/10.1016/j.neuron.2012.11.001>
- Schmidt H, Knösche TR (2019) **Action potential propagation and synchronisation in myelinated axons** *PLoS Computational Biology* **15**:e1007004. <http://dx.doi.org/10.1371/journal.pcbi.1007004>
- Scoville WB, Milner B (1957) **Loss of recent memory after bilateral hippocampal lesions** *Journal of Neurology, Neurosurgery and Psychiatry* **20**:11-21. <http://dx.doi.org/10.1136/jnnp.20.1.11>
- Shastin D, Genc S, Parker GD, Koller K, Tax CMW, Evans J, Hamandi K, Gray WP, Jones DK, Chamberland M (pre print) **Short association fibre tractography** *bioRxiv*:2021.2005.2007.443084. <http://dx.doi.org/10.1101/2021.05.07.443084>
- Spreng RN, Mar RA, Kim ASN (2009) **The common neural basis of autobiographical memory, prospection, navigation, theory of mind, and the default mode: A quantitative meta-analysis** *Journal of Cognitive Neuroscience* **21**:489-510. <http://dx.doi.org/10.1162/jocn.2008.21029>
- Steriade M (1995) **Two channels in the cerebellothalamocortical system** *Journal of Comparative Neurology* **354**:57-70. <https://doi.org/10.1002/cne.903540106>
- Stikov N, Campbell JSW, Stroh T, Lavelée M, Frey S, Novek J, Nuara S, Ho M-K, Bedell BJ, Dougherty RF, Leppert IR, Boudreau M, Narayanan S, Duval T, Cohen-Adad J, Picard P-A, Gasecka A, Côté D, Pike GB (2015) **In vivo histology of the myelin g-ratio with magnetic resonance imaging** *NeuroImage* **118**:397-405. <http://dx.doi.org/10.1016/j.neuroimage.2015.05.023>
- Svoboda E, McKinnon MC, Levine B (2006) **The functional neuroanatomy of autobiographical memory: A meta-analysis** *Neuropsychologia* **44**:2189-2208. <http://doi.org/10.1016/j.neuropsychologia.2006.05.023>
- Tabelow K, Balteau E, Ashburner J, Callaghan MF, Draganski B, Helms G, Kherif F, Leutritz T, Lutti A, Phillips C, Reimer E, Ruthotto L, Seif M, Weiskopf N, Ziegler G, Mohammadi S (2019) **hMRI – A toolbox for quantitative MRI in neuroscience and clinical research** *NeuroImage* **194**:191-210. <http://dx.doi.org/10.1016/j.neuroimage.2019.01.029>
- Tsivilis D, Vann SD, Denby C, Roberts N, Mayes AR, Montaldi D, Aggleton JP (2008) **A disproportionate role for the fornix and mammillary bodies in recall versus recognition memory** *Nature Neuroscience* **11**:834-842. <http://dx.doi.org/10.1038/nn.2149>
- Tulving E (2002) **Episodic memory: From mind to brain** *Annual Review of Psychology* **53**:1-25. <http://dx.doi.org/10.1146/annurev.psych.53.100901.135114>
- Van Petten C (2004) **Relationship between hippocampal volume and memory ability in healthy individuals across the lifespan: review and meta-analysis** *Neuropsychologia* **42**:1394-1413. <http://dx.doi.org/10.1016/j.neuropsychologia.2004.04.006>
- Vann SD, Aggleton JP, Maguire EA (2009) **What does the retrosplenial cortex do?** *Nature Reviews: Neuroscience* **10**:792-802. <http://dx.doi.org/10.1038/nrn2733>
- Von Der Heide RJ, Skipper LM, Klobusicky E, Olson IR (2013) **Dissecting the uncinate fasciculus: disorders, controversies and a hypothesis** *Brain* **136**:1692-1707. <http://dx.doi.org/10.1093/brain/awt094>
- Waxman SG (1980) **Determinants of conduction velocity in myelinated nerve fibers** *Muscle & Nerve* **3**:141-150. <https://doi.org/10.1002/mus.880030207>



- 1035 Weiskopf N, Suckling J, Williams G, Correia M, Inkster B, Tait R, Ooi C, Bullmore E, Lutti  
1036 A (2013) **Quantitative multi-parameter mapping of R1, PD\*, MT, and R2\* at 3T:**  
1037 **a multi-center validation** *Frontiers in Neuroscience* **7**.  
1038 <http://dx.doi.org/10.3389/fnins.2013.00095>
- 1039 West KL, Kelm ND, Carson RP, Does MD (2016) **A revised model for estimating g-ratio**  
1040 **from MRI** *NeuroImage* **125**:1155-1158.  
1041 <http://dx.doi.org/10.1016/j.neuroimage.2015.08.017>
- 1042 West KL, Kelm ND, Carson RP, Alexander DC, Gochberg DF, Does MD (2018)  
1043 **Experimental studies of g-ratio MRI in ex vivo mouse brain** *NeuroImage* **167**:366-  
1044 371. <http://dx.doi.org/10.1016/j.neuroimage.2017.11.064>
- 1045 Winocur G, Moscovitch M (2011) **Memory transformation and systems consolidation**  
1046 *Journal of the International Neuropsychological Society* **17**:766-780.  
1047 <http://dx.doi.org/10.1017/s1355617711000683>
- 1048 Xi MC, Liu RH, Engelhardt JK, Morales FR, Chase MH (1999) **Changes in the axonal**  
1049 **conduction velocity of pyramidal tract neurons in the aged cat** *Neuroscience*  
1050 **92**:219-225. [http://dx.doi.org/10.1016/S0306-4522\(98\)00754-4](http://dx.doi.org/10.1016/S0306-4522(98)00754-4)
- 1051 Xin W, Chan JR (2020) **Myelin plasticity: sculpting circuits in learning and memory** *Nature*  
1052 *Reviews Neuroscience* **21**:682-694. <http://dx.doi.org/10.1038/s41583-020-00379-8>
- 1053 Xu J, Moeller S, Auerbach EJ, Strupp J, Smith SM, Feinberg DA, Yacoub E, Ugurbil K (2013)  
1054 **Evaluation of slice accelerations using multiband echo planar imaging at 3T**  
1055 *NeuroImage* **83**:991-1001. <http://dx.doi.org/10.1016/j.neuroimage.2013.07.055>
- 1056 Yu F, Fan Q, Tian Q, Ngamsombat C, Machado N, Bireley JD, Russo AW, Nummenmaa A,  
1057 Witzel T, Wald LL, Klawiter EC, Huang SY (2019) **Imaging g-ratio in multiple**  
1058 **sclerosis using high-gradient diffusion MRI and macromolecular tissue volume**  
1059 *American Journal of Neuroradiology* **40**:1871. <http://dx.doi.org/10.3174/ajnr.A6283>
- 1060 Zhang H, Schneider T, Wheeler-Kingshott CA, Alexander DC (2012) **NODDI: Practical in**  
1061 **vivo neurite orientation dispersion and density imaging of the human brain**  
1062 *NeuroImage* **61**:1000-1016. <http://dx.doi.org/10.1016/j.neuroimage.2012.03.072>

# Appendix 1

- **Details of the simulation performed for Figure 1F.**
- **Investigation of the MR g-ratio, neurite orientation dispersion index, neurite density and physical parameters in the fornix and uncinate fasciculus.**
- **Exploratory analyses of the MR g-ratio, neurite orientation dispersion index, neurite density and physical parameters in other white matter tracts.**
- **Investigation of the physical parameters extracted from the parahippocampal cingulum bundle.**

# **Details of the simulation performed for Figure 1F**

In Figure 1F, inner axon diameter, myelin thickness and g-ratio are plotted together. The range of g-ratio values used in the simulation spanned two standard deviations about the mean MR g-ratio observed for the parahippocampal cingulum bundle in the current study (mean = 0.647, standard deviation = 0.043). The axon diameter was computed for this MR g-ratio range by re-arranging the equation presented in Berman et al. (2019) such that axon diameter =  $\exp(\frac{g-ratio-0.506}{0.22})$ . Fibre diameter was then calculated as fibre diameter =  $\frac{axon\ diameter}{g-ratio}$ , enabling myelin thickness to be computed as myelin thickness =  $\frac{fibre\ diameter-axon\ diameter}{2}$ .

We note that discrepancies between reported microscopic parameters (i.e., g-ratio, modelled axon diameter, and myelin thickness) derived from in vivo and ex vivo histology may arise due to two reasons. (1) The in vivo MR g-ratio is computed from volume-fractions unlike the microscopic g-ratio measured with histology. (2) The heuristic equation by Berman et al. (2019) that is relating the in vivo MR g-ratio to axon diameter is rather capturing the tail of the axon radii distribution.

**Investigation of the MR g-ratio, neurite orientation dispersion index, neurite density and physical parameters in the fornix and uncinate fasciculus**

As can be observed in the tables below, there were no significant correlations between microstructural measures or physical parameters and autobiographical memory recall ability for either of the tracts when using the corrected ( $p < 0.017$ ) threshold.

**Fornix**

The mean number of voxels in the region of interest (ROI) was 249.55 (SD = 23.09).

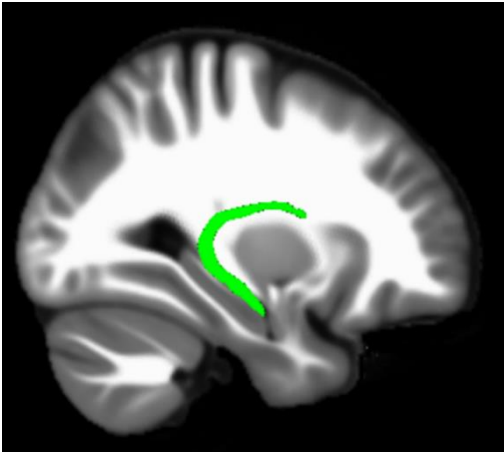

**Appendix 1—figure 1.** The location of the fornix.

**Appendix 1—table 1.** Means and standard deviations for the microstructure measures and physical parameters extracted from the fornix.

| Measure                                                         | Mean  | Standard Deviation |
|-----------------------------------------------------------------|-------|--------------------|
| MR g-ratio                                                      | 0.720 | 0.017              |
| Neurite dispersion (ODI)                                        | 0.143 | 0.021              |
| Neurite density                                                 | 0.601 | 0.045              |
| Fractional anisotropy                                           | 0.605 | 0.035              |
| Mean diffusivity ( $10^{-3} \text{ mm}^2/\text{s}$ )            | 0.901 | 0.036              |
| Mean kurtosis                                                   | 0.909 | 0.100              |
| Diffusivities parallel ( $10^{-3} \text{ mm}^2/\text{s}$ )      | 1.645 | 0.072              |
| Diffusivities perpendicular ( $10^{-3} \text{ mm}^2/\text{s}$ ) | 0.529 | 0.042              |

Note. ODI = Orientation Dispersion Index

**Appendix 1–table 2.** Partial correlations between the microstructure measures or physical parameters extracted from the fornix and memory recall ability (internal details).

| Measure                     | r(211) | p    | 95% Confidence Interval |       |
|-----------------------------|--------|------|-------------------------|-------|
|                             |        |      | Lower                   | Upper |
| MR g-ratio                  | -0.04  | 0.53 | -0.16                   | 0.08  |
| Neurite dispersion (ODI)    | -0.03  | 0.62 | -0.16                   | 0.10  |
| Neurite density             | -0.03  | 0.69 | -0.15                   | 0.10  |
| Fractional anisotropy       | 0.02   | 0.80 | -0.12                   | 0.15  |
| Mean diffusivity            | 0.07   | 0.35 | -0.08                   | 0.21  |
| Mean kurtosis               | -0.03  | 0.66 | -0.16                   | 0.10  |
| Diffusivities parallel      | 0.05   | 0.46 | -0.09                   | 0.19  |
| Diffusivities perpendicular | 0.02   | 0.74 | -0.12                   | 0.15  |

Note. ODI = Orientation Dispersion Index

**Uncinate fasciculus**

The mean number of voxels in the ROI was 191.98 (SD = 29.77).

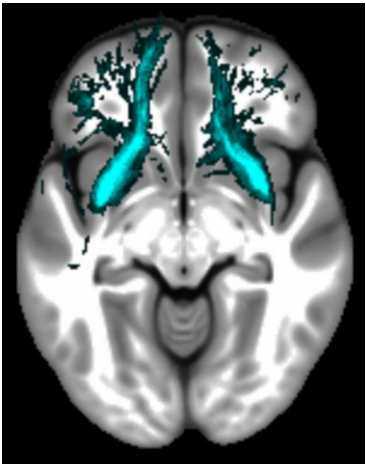

**Appendix 1—figure 2.** The location of the uncinate fasciculus.

**Appendix 1—table 3.** Means and standard deviations for the microstructure measures and physical parameters extracted from the uncinate fasciculus.

| Measure                                                         | Mean  | Standard Deviation |
|-----------------------------------------------------------------|-------|--------------------|
| MR g-ratio                                                      | 0.723 | 0.016              |
| Neurite dispersion (ODI)                                        | 0.189 | 0.022              |
| Neurite density                                                 | 0.562 | 0.045              |
| Fractional anisotropy                                           | 0.512 | 0.036              |
| Mean diffusivity ( $10^{-3} \text{ mm}^2/\text{s}$ )            | 0.877 | 0.304              |
| Mean kurtosis                                                   | 0.913 | 0.100              |
| Diffusivities parallel ( $10^{-3} \text{ mm}^2/\text{s}$ )      | 1.456 | 0.055              |
| Diffusivities perpendicular ( $10^{-3} \text{ mm}^2/\text{s}$ ) | 0.588 | 0.039              |

Note. ODI = Orientation Dispersion Index

**Appendix 1–table 4.** Partial correlations between the microstructure measures or physical parameters extracted from the uncinate fasciculus and memory recall ability (internal details).

| Measure                     | r(211) | p    | 95% Confidence Interval |       |
|-----------------------------|--------|------|-------------------------|-------|
|                             |        |      | Lower                   | Upper |
| MR g-ratio                  | 0.10   | 0.15 | -0.03                   | 0.22  |
| Neurite dispersion (ODI)    | -0.01  | 0.94 | -0.14                   | 0.13  |
| Neurite density             | 0.01   | 0.89 | -0.14                   | 0.16  |
| Fractional anisotropy       | -0.01  | 0.94 | -0.14                   | 0.13  |
| Mean diffusivity            | -0.01  | 0.87 | -0.14                   | 0.13  |
| Mean kurtosis               | -0.01  | 0.91 | -0.13                   | 0.18  |
| Diffusivities parallel      | -0.01  | 0.87 | -0.14                   | 0.13  |
| Diffusivities perpendicular | 0.00   | 0.96 | -0.15                   | 0.14  |

Note. ODI = Orientation Dispersion Index

# **Exploratory analyses of the MR g-ratio, neurite orientation dispersion index, neurite density and physical parameters in other white matter tracts**

As can be observed in the tables below, there were no significant correlations between microstructural measures or physical parameters and autobiographical memory recall ability for any of the tracts when using the corrected ( $p < 0.017$ ) threshold.

## **Anterior thalamic radiation**

The mean number of voxels in the ROI was 2090.21 ( $SD = 67.43$ ).

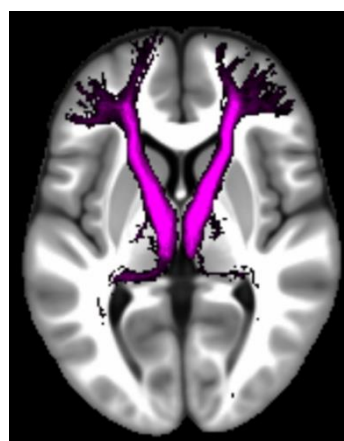

**Appendix 1—figure 3.** The location of the anterior thalamic radiation.

**Appendix 1—table 5.** Means and standard deviations for the microstructure measures and physical parameters extracted from the anterior thalamic radiation.

| Measure                                                         | Mean  | Standard Deviation |
|-----------------------------------------------------------------|-------|--------------------|
| MR g-ratio                                                      | 0.724 | 0.014              |
| Neurite dispersion (ODI)                                        | 0.252 | 0.017              |
| Neurite density                                                 | 0.598 | 0.041              |
| Fractional anisotropy                                           | 0.430 | 0.028              |
| Mean diffusivity ( $10^{-3} \text{ mm}^2/\text{s}$ )            | 0.861 | 0.029              |
| Mean kurtosis                                                   | 0.986 | 0.063              |
| Diffusivities parallel ( $10^{-3} \text{ mm}^2/\text{s}$ )      | 1.328 | 0.041              |
| Diffusivities perpendicular ( $10^{-3} \text{ mm}^2/\text{s}$ ) | 0.627 | 0.034              |

Note. ODI = Orientation Dispersion Index



**Appendix 1–table 6.** Partial correlations between the microstructure measures or physical parameters extracted from the anterior thalamic radiation and memory recall ability (internal details).

| Measure                     | r(211) | p    | 95% Confidence Interval |       |
|-----------------------------|--------|------|-------------------------|-------|
|                             |        |      | Lower                   | Upper |
| MR g-ratio                  | 0.05   | 0.47 | -0.06                   | 0.17  |
| Neurite dispersion (ODI)    | -0.05  | 0.46 | -0.18                   | 0.09  |
| Neurite density             | 0.10   | 0.16 | -0.04                   | 0.23  |
| Fractional anisotropy       | 0.08   | 0.26 | -0.06                   | 0.21  |
| Mean diffusivity            | 0.03   | 0.67 | -0.11                   | 0.17  |
| Mean kurtosis               | 0.07   | 0.28 | -0.07                   | 0.22  |
| Diffusivities parallel      | 0.09   | 0.20 | -0.04                   | 0.21  |
| Diffusivities perpendicular | -0.02  | 0.77 | -0.16                   | 0.12  |

Note. ODI = Orientation Dispersion Index

**Dorsal cingulum bundle**

The mean number of voxels in the ROI was 611.48 (*SD* = 25.29).

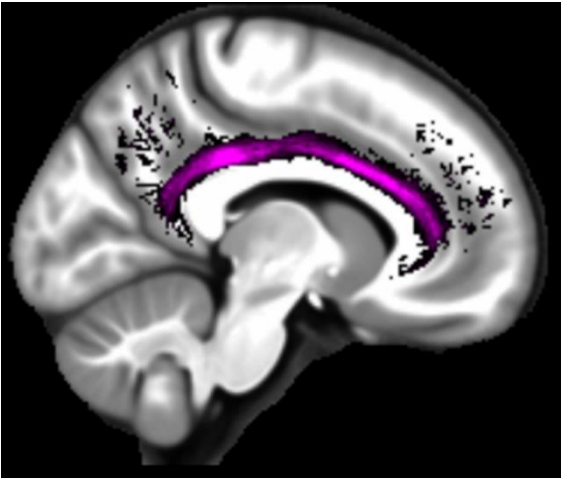

**Appendix 1—figure 4.** The location of the dorsal cingulum bundle.

**Appendix 1—table 7.** Means and standard deviations for the microstructure measures and physical parameters extracted from the dorsal cingulum bundle.

| Measure                                                     | Mean  | Standard Deviation |
|-------------------------------------------------------------|-------|--------------------|
| MR g-ratio                                                  | 0.710 | 0.016              |
| Neurite dispersion (ODI)                                    | 0.147 | 0.019              |
| Neurite density                                             | 0.560 | 0.038              |
| Fractional anisotropy                                       | 0.570 | 0.039              |
| Mean diffusivity ( $10^{-3}$ mm <sup>2</sup> /s)            | 0.862 | 0.026              |
| Mean kurtosis                                               | 0.862 | 0.093              |
| Diffusivities parallel ( $10^{-3}$ mm <sup>2</sup> /s)      | 1.531 | 0.061              |
| Diffusivities perpendicular ( $10^{-3}$ mm <sup>2</sup> /s) | 0.527 | 0.040              |

Note. ODI = Orientation Dispersion Index

**Appendix 1–table 8.** Partial correlations between the microstructure measures or physical parameters extracted from the dorsal cingulum bundle and memory recall ability (internal details).

| Measure                     | r(211) | p    | 95% Confidence Interval |       |
|-----------------------------|--------|------|-------------------------|-------|
|                             |        |      | Lower                   | Upper |
| MR g-ratio                  | 0.09   | 0.22 | -0.04                   | 0.21  |
| Neurite dispersion (ODI)    | 0.09   | 0.17 | -0.05                   | 0.23  |
| Neurite density             | 0.09   | 0.17 | -0.05                   | 0.23  |
| Fractional anisotropy       | 0.01   | 0.85 | -0.13                   | 0.16  |
| Mean diffusivity            | 0.06   | 0.43 | -0.08                   | 0.19  |
| Mean kurtosis               | 0.13   | 0.05 | 0.00                    | 0.27  |
| Diffusivities parallel      | 0.05   | 0.48 | -0.08                   | 0.18  |
| Diffusivities perpendicular | 0.01   | 0.91 | -0.14                   | 0.15  |

Note. ODI = Orientation Dispersion Index

## Forceps minor

The mean number of voxels in the ROI was 4613.67 ( $SD = 78.02$ ).

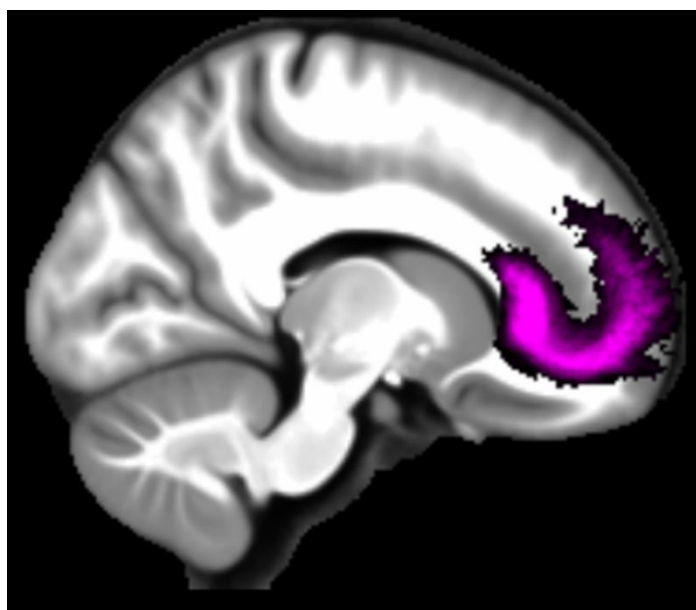

**Appendix 1—figure 5.** The location of the forceps minor.

**Appendix 1—table 9.** Means and standard deviations for the microstructure measures and physical parameters extracted from the forceps minor.

| Measure                                                         | Mean  | Standard Deviation |
|-----------------------------------------------------------------|-------|--------------------|
| MR g-ratio                                                      | 0.698 | 0.026              |
| Neurite dispersion (ODI)                                        | 0.201 | 0.016              |
| Neurite density                                                 | 0.601 | 0.042              |
| Fractional anisotropy                                           | 0.500 | 0.027              |
| Mean diffusivity ( $10^{-3} \text{ mm}^2/\text{s}$ )            | 0.881 | 0.031              |
| Mean kurtosis                                                   | 0.947 | 0.128              |
| Diffusivities parallel ( $10^{-3} \text{ mm}^2/\text{s}$ )      | 1.467 | 0.052              |
| Diffusivities perpendicular ( $10^{-3} \text{ mm}^2/\text{s}$ ) | 0.588 | 0.034              |

Note. ODI = Orientation Dispersion Index

**Appendix 1–table 10.** Partial correlations between the microstructure measures or physical parameters extracted from the forceps minor and memory recall ability (internal details).

| Measure                     | r(211) | p    | 95% Confidence Interval |       |
|-----------------------------|--------|------|-------------------------|-------|
|                             |        |      | Lower                   | Upper |
| MR g-ratio                  | 0.04   | 0.53 | -0.07                   | 0.18  |
| Neurite dispersion (ODI)    | -0.06  | 0.38 | -0.21                   | 0.07  |
| Neurite density             | 0.09   | 0.19 | -0.04                   | 0.22  |
| Fractional anisotropy       | 0.10   | 0.17 | -0.03                   | 0.23  |
| Mean diffusivity            | -0.04  | 0.56 | -0.17                   | 0.09  |
| Mean kurtosis               | 0.00   | 0.97 | -0.11                   | 0.21  |
| Diffusivities parallel      | 0.03   | 0.67 | -0.09                   | 0.18  |
| Diffusivities perpendicular | -0.07  | 0.32 | -0.19                   | 0.05  |

Note. ODI = Orientation Dispersion Index

## Inferior longitudinal fasciculus

The mean number of voxels in the ROI was 2844.03 ( $SD = 52.97$ ).

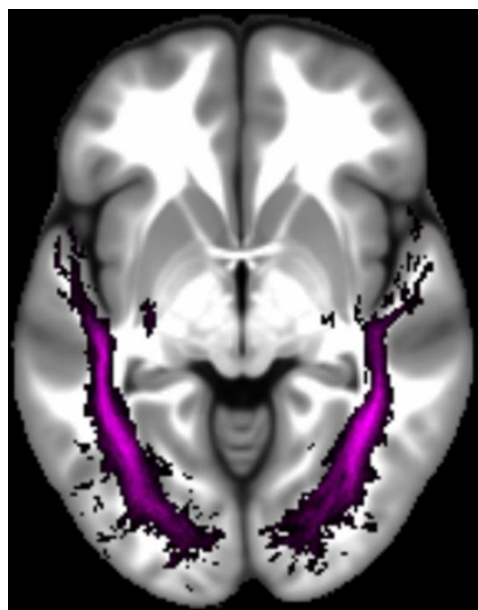

**Appendix 1—figure 6.** The location of the inferior longitudinal fasciculus.

**Appendix 1—table 11.** Means and standard deviations for the microstructure measures and physical parameters extracted from the inferior longitudinal fasciculus.

| Measure                                                         | Mean  | Standard Deviation |
|-----------------------------------------------------------------|-------|--------------------|
| MR g-ratio                                                      | 0.724 | 0.013              |
| Neurite dispersion (ODI)                                        | 0.184 | 0.017              |
| Neurite density                                                 | 0.558 | 0.041              |
| Fractional anisotropy                                           | 0.486 | 0.028              |
| Mean diffusivity ( $10^{-3} \text{ mm}^2/\text{s}$ )            | 0.902 | 0.029              |
| Mean kurtosis                                                   | 0.918 | 0.061              |
| Diffusivities parallel ( $10^{-3} \text{ mm}^2/\text{s}$ )      | 1.473 | 0.045              |
| Diffusivities perpendicular ( $10^{-3} \text{ mm}^2/\text{s}$ ) | 0.616 | 0.035              |

Note. ODI = Orientation Dispersion Index

**Appendix 1–table 12.** Partial correlations between the microstructure measures or physical parameters extracted from the inferior longitudinal fasciculus and memory recall ability (internal details).

| Measure                     | r(211) | p    | 95% Confidence Interval |       |
|-----------------------------|--------|------|-------------------------|-------|
|                             |        |      | Lower                   | Upper |
| MR g-ratio                  | 0.07   | 0.35 | -0.06                   | 0.19  |
| Neurite dispersion (ODI)    | -0.03  | 0.64 | -0.17                   | 0.10  |
| Neurite density             | 0.07   | 0.35 | -0.07                   | 0.19  |
| Fractional anisotropy       | 0.10   | 0.14 | -0.04                   | 0.23  |
| Mean diffusivity            | -0.01  | 0.87 | -0.15                   | 0.13  |
| Mean kurtosis               | 0.10   | 0.16 | -0.03                   | 0.23  |
| Diffusivities parallel      | 0.07   | 0.29 | -0.07                   | 0.21  |
| Diffusivities perpendicular | -0.07  | 0.34 | -0.19                   | 0.07  |

Note. ODI = Orientation Dispersion Index

**Inferior occipitofrontal fasciculus**

The mean number of voxels in the ROI was 3344.31 (*SD* = 46.0).

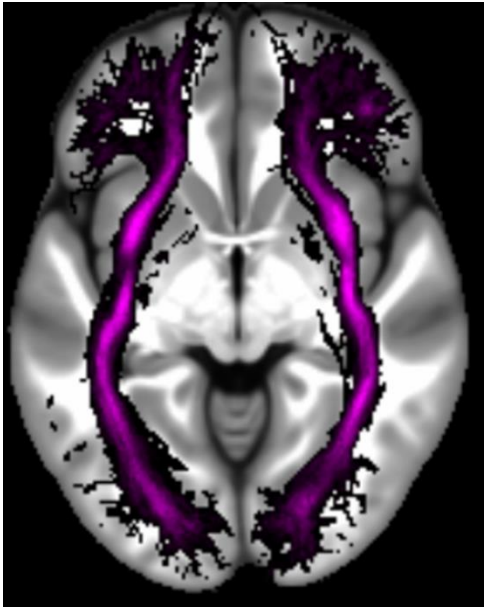

**Appendix 1—figure 7.** The location of the inferior occipitofrontal fasciculus.

**Appendix 1—table 13.** Means and standard deviations for the microstructure measures and physical parameters extracted from the inferior occipitofrontal fasciculus.

| Measure                                                     | Mean  | Standard Deviation |
|-------------------------------------------------------------|-------|--------------------|
| MR g-ratio                                                  | 0.729 | 0.011              |
| Neurite dispersion (ODI)                                    | 0.179 | 0.012              |
| Neurite density                                             | 0.563 | 0.036              |
| Fractional anisotropy                                       | 0.508 | 0.024              |
| Mean diffusivity ( $10^{-3}$ mm <sup>2</sup> /s)            | 0.889 | 0.026              |
| Mean kurtosis                                               | 0.912 | 0.057              |
| Diffusivities parallel ( $10^{-3}$ mm <sup>2</sup> /s)      | 1.488 | 0.039              |
| Diffusivities perpendicular ( $10^{-3}$ mm <sup>2</sup> /s) | 0.590 | 0.031              |

Note. ODI = Orientation Dispersion Index



**Appendix 1–table 14.** Partial correlations between the microstructure measures or physical parameters extracted from the inferior occipitofrontal fasciculus and memory recall ability (internal details).

| Measure                     | r(211) | p    | 95% Confidence Interval |       |
|-----------------------------|--------|------|-------------------------|-------|
|                             |        |      | Lower                   | Upper |
| MR g-ratio                  | -0.01  | 0.93 | -0.12                   | 0.12  |
| Neurite dispersion (ODI)    | -0.01  | 0.89 | -0.14                   | 0.13  |
| Neurite density             | 0.06   | 0.42 | -0.07                   | 0.18  |
| Fractional anisotropy       | 0.06   | 0.38 | -0.08                   | 0.20  |
| Mean diffusivity            | 0.00   | 0.99 | -0.13                   | 0.13  |
| Mean kurtosis               | 0.07   | 0.31 | -0.06                   | 0.19  |
| Diffusivities parallel      | 0.05   | 0.50 | -0.09                   | 0.18  |
| Diffusivities perpendicular | -0.03  | 0.62 | -0.17                   | 0.10  |

Note. ODI = Orientation Dispersion Index

**Superior longitudinal fasciculus**

The mean number of voxels in the ROI was 4243.22 (*SD* = 39.80).

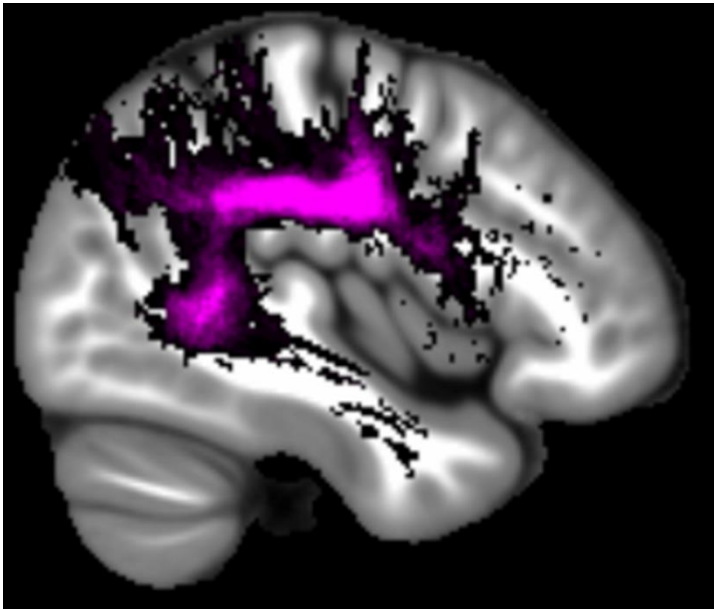

**Appendix 1—figure 8.** The location of the superior longitudinal fasciculus.

**Appendix 1—table 15.** Means and standard deviations for the microstructure measures and physical parameters extracted from the superior longitudinal fasciculus.

| Measure                                                         | Mean  | Standard Deviation |
|-----------------------------------------------------------------|-------|--------------------|
| MR g-ratio                                                      | 0.751 | 0.011              |
| Neurite dispersion (ODI)                                        | 0.218 | 0.012              |
| Neurite density                                                 | 0.634 | 0.034              |
| Fractional anisotropy                                           | 0.471 | 0.026              |
| Mean diffusivity ( $10^{-3} \text{ mm}^2/\text{s}$ )            | 0.825 | 0.025              |
| Mean kurtosis                                                   | 1.029 | 0.041              |
| Diffusivities parallel ( $10^{-3} \text{ mm}^2/\text{s}$ )      | 1.324 | 0.035              |
| Diffusivities perpendicular ( $10^{-3} \text{ mm}^2/\text{s}$ ) | 0.575 | 0.041              |

Note. ODI = Orientation Dispersion Index

**Appendix 1–table 16.** Partial correlations between microstructure measures or physical parameters extracted from the superior longitudinal fasciculus and memory recall ability (internal details).

| Measure                     | r(211) | p    | 95% Confidence Interval |       |
|-----------------------------|--------|------|-------------------------|-------|
|                             |        |      | Lower                   | Upper |
| MR g-ratio                  | 0.08   | 0.28 | -0.05                   | 0.20  |
| Neurite dispersion (ODI)    | -0.09  | 0.17 | -0.23                   | 0.05  |
| Neurite density             | 0.12   | 0.09 | -0.01                   | 0.24  |
| Fractional anisotropy       | 0.13   | 0.05 | 0.01                    | 0.26  |
| Mean diffusivity            | -0.02  | 0.80 | -0.14                   | 0.11  |
| Mean kurtosis               | 0.11   | 0.12 | -0.03                   | 0.24  |
| Diffusivities parallel      | 0.12   | 0.09 | -0.03                   | 0.25  |
| Diffusivities perpendicular | -0.08  | 0.23 | -0.20                   | 0.03  |

Note. ODI = Orientation Dispersion Index

## Investigation of the physical parameters extracted from the parahippocampal cingulum bundle

As reported in the main text, significant correlations between a number of microstructural measures from the parahippocampal cingulum bundle and autobiographical memory recall ability were evident. This was also the case for several of the physical parameters – see Appendix 1–tables 17 and 18 and Appendix 1–figures 9 and 10 below.

**Appendix 1–table 17.** Means and standard deviations for the physical parameters extracted from the parahippocampal cingulum bundle.

| Measure                                                         | Mean  | Standard Deviation |
|-----------------------------------------------------------------|-------|--------------------|
| Fractional anisotropy                                           | 0.466 | 0.053              |
| Mean diffusivity ( $10^{-3} \text{ mm}^2/\text{s}$ )            | 0.931 | 0.041              |
| Mean kurtosis                                                   | 0.779 | 0.122              |
| Diffusivities parallel ( $10^{-3} \text{ mm}^2/\text{s}$ )      | 1.479 | 0.071              |
| Diffusivities perpendicular ( $10^{-3} \text{ mm}^2/\text{s}$ ) | 0.656 | 0.057              |

**Appendix 1–table 18.** Partial correlations between the physical parameters extracted from the parahippocampal cingulum bundle and memory recall ability (internal details).

| Measure                     | r(211) | p      | 95% Confidence Interval<br>Lower | Upper |
|-----------------------------|--------|--------|----------------------------------|-------|
| Fractional anisotropy       | 0.20   | 0.003* | 0.07                             | 0.32  |
| Mean diffusivity            | -0.02  | 0.72   | -0.15                            | 0.11  |
| Mean kurtosis               | 0.08   | 0.23   | -0.05                            | 0.21  |
| Diffusivities parallel      | 0.19   | 0.005* | 0.06                             | 0.32  |
| Diffusivities perpendicular | 0.15   | 0.03   | -0.27                            | -0.02 |

\*  $p < 0.017$  (two-sided Bonferroni corrected threshold)

Specifically, partial correlation analyses, with age, gender, scanner and the number of voxels in the ROI included as covariates revealed a significant positive correlation between internal details and fractional anisotropy (FA) (Appendix 1–figure 9A;  $r(211) = 0.20$ ,  $p = 0.003$ , 95%

CI = 0.07, 0.32). This relationship was specific to internal details, and was not evident for the external details control measure (Appendix 1–figure 9B;  $r(211) = -0.06$ ,  $p = 0.39$ , 95% CI = -0.19, 0.07). Direct comparison of the two correlations confirmed a significant difference between them, showing that parahippocampal cingulum bundle FA was related to internal details to a greater extent than external details (Appendix 1–figure 9C; mean  $r$  difference = 0.26 (95% CI = 0.10, 0.44),  $z = 3.08$ ,  $p = 0.002$ ).

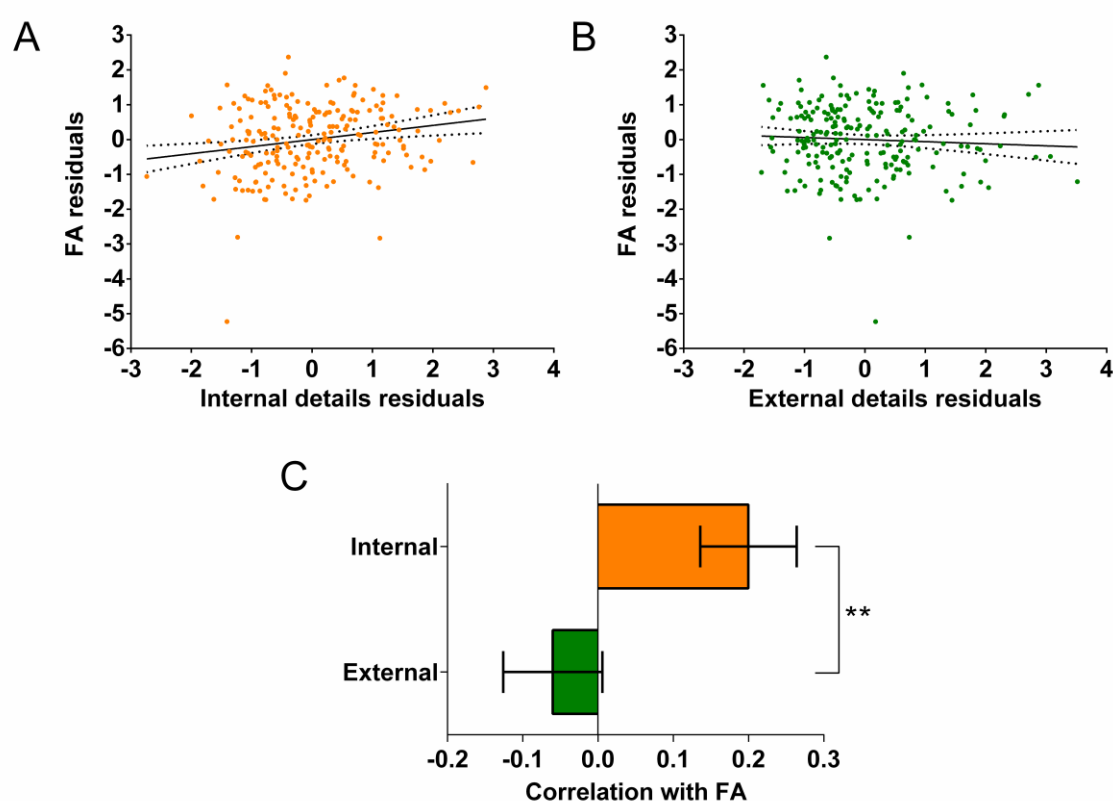

**Appendix 1–figure 9.** Fractional anisotropy (FA) and the parahippocampal cingulum bundle. The relationships between parahippocampal cingulum bundle FA and autobiographical memory recall ability (internal details), and the control measure (external details) are shown. (A) There was a significant positive correlation between FA and internal details (dashed lines indicate the confidence intervals). (B) There was no significant relationship between FA and external details. (C) Bar chart showing the partial correlation coefficients (with standard errors) between FA and internal and external details. There was a significant difference between the correlations when they were directly compared;  $**p < 0.01$ . Data points for this figure are provided in Supplementary file 2.

In addition, a significant positive correlation between parallel diffusivity and the number of internal details was also apparent (Appendix 1–figure 10A;  $r(211) = 0.19$ ,  $p = 0.005$ , 95% CI = 0.06, 0.32). As with FA, no significant relationship was observed between parallel diffusivity and external details (Appendix 1–figure 10B;  $r(211) = -0.048$ ,  $p = 0.49$ , 95% CI = -0.19, 0.10). Direct comparison of the correlations confirmed that parallel diffusivity was related to internal details to a greater extent than external details (Appendix 1–figure 10C; mean  $r$  difference = 0.24 (95% CI = 0.07, 0.41),  $z = 2.81$ ,  $p = 0.0049$ ).

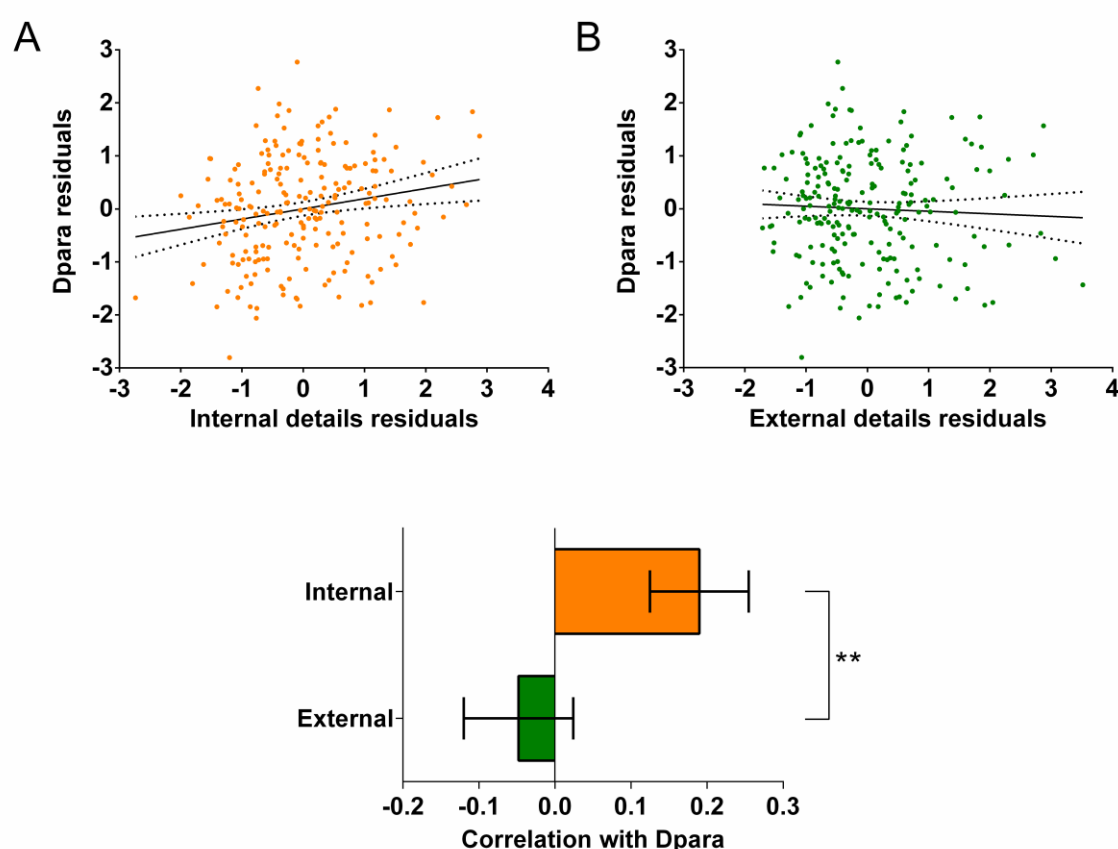

**Appendix 1–figure 10.** Dpara and the parahippocampal cingulum bundle. The relationships between parahippocampal cingulum bundle parallel diffusivity (Dpara) and autobiographical memory recall ability (internal details), and the control measure (external details) are shown. (A) There was a significant positive correlation between Dpara and internal details (dashed lines indicate the confidence intervals). (B) There was no significant relationship between Dpara and external details. (C) Bar chart showing the partial correlation coefficients (with standard errors) between Dpara and internal and external details. There was a significant difference between the correlations when they were directly compared;  $**p < 0.01$ . Data points for this figure are provided in Supplementary file 2.

1332           In contrast, no relationships were observed when examining the partial correlations  
1333   between either internal or external details and MD (internal:  $r(211) = -0.02$ ,  $p = 0.72$ , 95% CI  
1334   = -0.15, 0.11; external:  $r(211) = 0.01$ ,  $p = 0.86$ , 95% CI = -0.11, 0.14), the mean kurtosis  
1335   (internal:  $r(211) = 0.08$ ,  $p = 0.23$ , 95% CI = -0.05, 0.21; external:  $r(211) = 0.03$ ,  $p = 0.62$ , 95%  
1336   CI = -0.01, 0.16) or perpendicular diffusivity (internal:  $r(211) = -0.15$ ,  $p = 0.03$ , 95% CI = -  
1337   0.27, -0.02; external:  $r(211) = 0.44$ ,  $p = 0.52$ , 95% CI = -0.08, 0.17), when using the corrected  
1338   ( $p < 0.017$ ) threshold. This suggests that none of these parameters were strongly associated  
1339   with individual differences in autobiographical memory recall.
